1 **Tomato yellow leaf curl virus V2 protein plays a critical role in the**  
2 **nuclear export of V1 protein and viral systemic infection**

3 Wenhao Zhao<sup>1,2</sup>, Yinghua Ji<sup>1</sup>, Shuhua Wu<sup>1</sup>, Elizabeth Barton<sup>2</sup>, Yongjian Fan<sup>1</sup>,  
4 Xiaofeng Wang<sup>2\*</sup>, Yijun Zhou<sup>1\*</sup>

5

6 <sup>1</sup>Institute of Plant Protection, Jiangsu Academy of Agricultural Sciences, Key Lab of  
7 Food Quality and Safety of Jiangsu Province—State Key Laboratory Breeding Base,  
8 Nanjing, 210014, China

9 <sup>2</sup>School of Plant and Environmental Sciences, Virginia Tech, Blacksburg, VA, 24061,  
10 United States of America

11

12 \*Corresponding author: Yijun Zhou: [yjzhou@jaas.ac.cn](mailto:yjzhou@jaas.ac.cn)

13 Xiaofeng Wang: [reachxw@vt.edu](mailto:reachxw@vt.edu)

14

15 **Abstract**

16 Geminiviruses are an important group of circular, single-stranded DNA viruses  
17 that cause devastating diseases in crops. Geminiviruses replicate their genomic DNA  
18 in the nucleus. The newly-synthesized viral DNA is subsequently transported to the  
19 cytoplasm, moved to adjacent cells through plasmodesmata with the help of viral  
20 movement proteins, and, ultimately, moved long-distance to establish systemic  
21 infection. Thus, the nucleocytoplasmic transportation is crucial for a successful

22 infection by geminiviruses. For *Tomato yellow leaf curl virus* (TYLCV), the V1  
23 protein is known to bind and shuttle viral genomic DNA, but the role of V2 protein in  
24 this process is still unclear. Here, we report that the nucleus-localized V1 protein  
25 dramatically decreases when co-expressed with V2 protein, and that V2-facilitated  
26 nuclear export of V1 protein depends on host exportin- $\alpha$  and a specific V1-V2  
27 interaction. Chemical inhibition of exportin- $\alpha$  or a substitutions at cysteine 85 of V2  
28 protein, which abolishes the V1-V2 interaction, blocks the promoted redistribution of  
29 V1 protein to the perinuclear region and the cytoplasm. When the V2<sup>C85S</sup> mutation is  
30 incorporated into a TYLCV infectious clone, the TYLCV-C85S causes delayed onset  
31 of very mild symptoms compared to wild-type TYLCV, indicating that the V1-V2  
32 interaction and, thus, V2-mediated nuclear export of V1 protein is crucial for viral  
33 spread and systemic infection. Our data point to a critical role of the V2 protein in  
34 promoting the nuclear export of the V1 protein, likely by promoting V1-mediated  
35 nucleocytoplasmic transportation of TYLCV genomic DNA, and in turn, promoting  
36 viral systemic infection.

37

### 38 **Author summary**

39 As both replication and the transcription of geminiviruses occur in the nucleus,  
40 transportation of the viral genomic DNA into and out of the nucleus of the infected  
41 cells is essential for a successful infection cycle. However, the nuclear export of  
42 geminiviruses is still little known and even less is known about the process for

43 monopartite geminiviruses. We use TYLCV, a typical monopartite begomovirus in  
44 the family *Geminiviridae*, to examine the nucleocytoplasmic transportation. In this  
45 study, we found TYLCV V2 is able to redistribute the nucleus-localized V1 protein to  
46 the perinuclear region. Moreover, the nuclear export of V1 protein is dependent on the  
47 V1-V2 interaction and host exportin- $\alpha$ . Blocking the V1-V2 interaction impeded the  
48 V2-mediated V1 protein redistribution and decrease TYLCV infection efficiency with  
49 delayed and mild symptoms. This report shows us a new explanation for the role of  
50 V2 in the nuclear export of V1 protein and TYLCV viral systemic infection.

51

## 52 **Introduction**

53 Geminiviruses are a group of plant viruses with a circular, single-stranded DNA  
54 genome. Viruses in this family cause devastating diseases in crop plants, leading to  
55 agricultural losses worldwide [1-4]. While viral gene expression occurs in the  
56 cytoplasm, replication of geminiviruses occurs in the nucleus of infected host cells [5].  
57 It is crucial that viral proteins involved in replication enter into the nucleus to execute  
58 their functions and in addition, newly synthesized viral genomic DNA are exported  
59 from the nucleus to the cytoplasm for further spread to adjacent cells and cause  
60 systemic infection through long-distance movement. Therefore, the  
61 nucleocytoplasmic shuttling of geminiviruses proteins and genomic DNA is of great  
62 significance for viral systemic infection and virus control.

63 Geminiviruses can be divided into two major groups based on their genomic  
64 components: one group is the monopartite geminiviruses, while the other group is the  
65 bipartite geminiviruses [5]. The bipartite geminiviruses genome is composed of two  
66 circular 2.5- to 2.8-kb ss-DNA molecules (DNA-A and DNA-B). The movement of  
67 bipartite geminiviruses requires two proteins, BV1 and BC1, that are encoded by  
68 DNA-B [6-10]. BV1 is a nuclear shuttle protein and plays an important role in the  
69 nucleocytoplasmic shuttling of viral genomic DNA [6-9, 11]. BC1 facilitates  
70 cell-to-cell movement after genomic DNAs are exported out of the nucleus.

71 The genome of monopartite geminiviruses contains only one component,  
72 DNA-A. Because monopartite geminiviruses lack the DNA-B component, the  
73 mechanism for movement of the virus is not clear yet. As DNA-A encode more viral  
74 proteins compared with DNA-B, and many of the proteins are multifunctional, which  
75 makes it more challenging to examine the nucleocytoplasmic shuttling of viral DNA  
76 of monopartite geminiviruses. Only a few viruses have been examined, such as *Maize*  
77 *streak virus* (MSV) and *Tomato yellow leaf curl virus* (TYLCV) [12, 13, 14]. It has  
78 been reported that V1 protein binds to viral genomic DNA and shuttles them between  
79 the nucleus and cytoplasm [11, 15, 16]. It was later reported that host proteins are also  
80 required for the process. Nuclear transporter KAP $\alpha$  helps TYLCV to enter the  
81 nucleus [17, 18] and exportin- $\alpha$  is required for the nuclear export of the C4 protein of  
82 *Tomato leaf curl Yunnan virus* (TLCYnV) [19]. In addition, nuclear shuttling of  
83 monopartite geminiviruses also involve viral proteins other than V1 protein,



84 suggesting a protein complex may be involved [13, 19, 20]. However, it is unclear  
85 what viral proteins or how they work together to accomplish transportation between  
86 the nucleus and the cytoplasm.

87 TYLCV is a typical monopartite begomovirus in the family *Geminiviridae*. The  
88 single ssDNA genome has six open reading frames (ORFs) and an intergenic region  
89 (IR). Four ORFs (C1, C2, C3 and C4) are located on the complementary strand and  
90 the other two ORFs (V1 and V2) are located on the viral strand [21].

91 Replication-associated protein (Rep) encoded by C1, transcriptional activator protein  
92 (TrAP) encoded by C2 and replication enhancer protein (REn) encoded by C3 are all  
93 involved in viral replication. C4 protein is likely involved in symptom development  
94 and viral movement. V1 encodes the capsid protein (CP), which facilitates virion  
95 assembly and viral trafficking [1, 13, 22, 23]. V2 protein is a gene silencing  
96 suppressor at both the post-transcriptional stage (PTGS) [24] and the transcriptional  
97 level stage (TGS) [25]. V2 protein is also involved in the regulation of host defense  
98 responses [26] and viral movement [13], playing important roles in viral spread and  
99 systemic infection [27].

100 For the nucleocytoplasmic transportation of TYLCV, V1 protein is well-known  
101 as a nuclear shuttle protein and for its role in binding viral genomic DNA [13]. Early  
102 studies showed that V1 protein binds viral genomic ssDNA in the cytoplasm and  
103 moves them into the nucleus for replication [28, 29]. V1 protein also interacts with the  
104 host plant nuclear transporter protein to facilitate the entry of virus into the nucleus

105 [17]. In addition, V1 protein also helps viral genomic DNA to move out of the  
106 nucleus for further translation and expression when offspring genomic DNA is  
107 synthesized [13]. This suggests that V1 protein is functionally equivalent to BV1 of  
108 bipartite geminiviruses. However, several lines of evidence suggest that other viral  
109 proteins, such as V2, are also involved [5, 13, 17, 30, 31, 32]. Rojas et al. found that  
110 the efficiency of nuclear export of viral DNA was enhanced by 20-30% in the  
111 presence of V2 protein, suggesting a role for V2 protein in the V1 protein-mediated  
112 nuclear export of viral genomic DNA [13]. However, the mechanism whereby V2  
113 protein facilitates V1-mediated viral genomic DNA trafficking from the nucleus is  
114 unknown.

115 In this study, we demonstrate that V2 protein affects the subcellular localization  
116 of V1 protein by dramatically decreasing the nucleus-localized V1 protein in  
117 *Nicotiana benthamian* cells, possibly through host exportin- $\alpha$  (XPO I), which often  
118 mediates nuclear export of proteins. A specific interaction between V2 and V1  
119 proteins has been identified by co-immunoprecipitation (Co-IP) and bimolecular  
120 fluorescence complementation (BiFC). Substitutions in cystine 85 of the V2 protein  
121 inhibits the V1-V2 interaction, blocks the effect of V2 protein on the subcellular  
122 localization of V1 protein, and causes delayed and mild symptom in plants. Our  
123 results indicate that V2 protein interacts with V1 protein, promotes the nuclear export  
124 of V1 protein, and plays an important role in viral systemic infection.

125

## 126 **Results**

### 127 **V2 Protein Affects the Nuclear Localization of V1 Protein**

128 TYLCV V1 protein is known as a nucleocytoplasmic shuttle protein that  
129 facilitates the transport of viral genomic DNA into and out of the nucleus. When  
130 expressed in cells of *Nicotiana benthamiana* by agroinfiltration as a YFP-tagged  
131 protein, V1-YFP, the YFP signal was found in both the nucleus and cytoplasm at 40  
132 hours post infiltration (hpi) (Fig 1a), consistent with its role in nuclear transportation  
133 of viral genomic DNA.

134 Since V2 protein was reported to facilitate the export of viral genomic DNA  
135 from the nucleus [13], we tested whether V2 protein does so by promoting the nucleus  
136 export of the V1 protein. We first tested for the subcellular localization of V2 as a  
137 YFP-tag (V2-YFP) in *N. benthamiana* cells via agroinfiltration. The fluorescence  
138 signal was observed under a laser confocal microscope at 40 hpi. YFP-V2 was mainly  
139 present in the cytoplasm and perinuclear regions, but a much weaker signal was also  
140 present in the nucleus (Fig 1b). To further clarify the function of V2 protein in the  
141 nuclear export of TYLCV, we co-expressed FLAG-tagged V2 protein (FLAG-V2)  
142 with V1-YFP. Interestingly, only a weaker fluorescence signal of V1 protein was  
143 found in the nucleus compared to that of V1 protein alone (Fig 1a). To rule out the  
144 possibility that the weaker signal of V1-YFP in the nucleus was due to decreased  
145 expression and/or stability in the presence of V2, we checked the accumulation of  
146 V1-YFP by Western blotting. Our results showed that both V2 and V1 proteins were

147 expressed well when co-expressed (Fig 1a). An increased accumulation of V1-YFP  
148 was sometimes noticed when it was co-expressed with FLAG-V2 than when it was  
149 expressed alone, indicating that the lower V1-YFP signal in the nucleus was not due  
150 to its decreased accumulation in the presence of FLAG-V2.

151 To confirm our visual observations, we performed a fractionation assay to  
152 separate the nucleus from the cytoplasm [19] and tested the localization of V1-YFP in  
153 the absence and presence of the V2 protein. To this end, we expressed FLAG-V2 and  
154 V1-YFP in Histone 2B (H2B)-RFP transgenic plants. As shown in Fig 1c, we only  
155 detected H2B-RFP in the nuclear fraction but not the cytoplasmic fraction; a  
156 cytoplasmic marker, phosphoenolpyruvate carboxylase (PEPC), was only present in  
157 the cytoplasm fraction, not in the nuclear fraction. Under such conditions, FLAG-V2  
158 was primarily detected in the cytoplasm fraction but only weakly in the nucleus.  
159 Although V1-YFP was detected in both fractions when expressed alone, the amount  
160 in the nuclear fraction significantly decreased in the presence of FLAG-V2, which is  
161 consistent with the results based on fluorescence microscopy (Fig 1c). To provide a  
162 numeric reading, we set the sum of V1-YFP signal intensity in the cytoplasm and  
163 nucleus at 100%. In the absence of FLAG-V2, we found 43% of V1-YFP was  
164 associated with the nuclear fraction but decreased to 11% in the presence of  
165 FLAG-V2. We concluded from these results that V2 is able to change the nuclear  
166 localization of V1 protein.

167

## 168 **V2 Protein Interacts with V1 Protein**

169 We set out to understand the underlying mechanism by which V2 protein affects  
170 the subcellular localization of V1 protein by first testing whether there is an  
171 interaction between V2 and V1 proteins by using a co-immunoprecipitation (Co-IP)  
172 assay. FLAG-tagged V2 (FLAG-V2) was co-expressed with YFP or V1-YFP in *N.*  
173 *benthamiana*. Total protein extracts were subject to immunoprecipitation by using  
174 FLAG-trap beads, and the resulting precipitates were analyzed using an anti-YFP  
175 antibody or an anti-FLAG antibody. Although a similar amount of FLAG-V2 was  
176 pulled down with FLAG-trap beads, only V1-YFP, but not YFP, was detected (Fig  
177 2a), even though both YFP and V1-YFP were well expressed (Fig 2a).

178 The fact that V1 protein was co-precipitated with V2 protein suggests that V2  
179 protein may bind to V1 to form a V1-V2 protein complex. To confirm the V1-V2  
180 interaction and identify the location where the V1 and V2 proteins may form a  
181 complex, we used a bimolecular fluorescence complementation (BiFC) assay. A  
182 positive interaction between nYFP-V1 and cYFP-V2 was observed in both the  
183 cytoplasm and perinuclear region, as indicated by the presence of reconstituted green  
184 fluorescence (Fig 2b). We also noticed a faint fluorescence signal inside the nucleus.  
185 It should be noted that V1-YFP also localized in the cytoplasm and the perinuclear  
186 region when it was co-infiltrated with FLAG-V2 (Fig 1a), suggesting that V2 binds  
187 V1 protein at the perinucleus and the cytoplasm. No green fluorescence signal was  
188 generated when nYFP-V1 and cYFP, or nYFP and cYFP-V2, or nYFP and cYFP

189 were co-expressed (Fig 2b), reinforcing a specific interaction between V2 and V1  
190 proteins in plant cells.

191

## 192 **V2 Mediates the Nucleocytoplasmic Shuttling of V1 Protein Through Host**

### 193 **Exportin- $\alpha$**

194 V2 can change the nuclear localization of the V1 protein, decreasing its  
195 accumulation in the nucleus. These results raised the possibility that V2 might help  
196 V1 protein export from the nucleus to the cytoplasm. Because the nuclear export of  
197 proteins is often mediated by exportin- $\alpha$ , we tested the subcellular localization of V2  
198 upon treatment with leptomycin B (LMB), an inhibitor of exportin- $\alpha$  [33]. As  
199 expected, the level of nuclear-localized V2-YFP was increased after LMB treatment  
200 in epidermal cells of H2B-RFP transgenic *N. benthamiana* plants (Fig 3a), suggesting  
201 that V2 depends on exportin- $\alpha$  to move out of the nucleus. To confirm our  
202 observations, we performed a nuclear-cytoplasmic fractionation assay on H2B-RFP  
203 transgenic *N. benthamiana* plants expressing V2-YFP with or without LMB treatment.  
204 H2B-RFP and PEPC were used as nuclear- and cytoplasmic-localized marker proteins,  
205 respectively. About 32% of the total V2-YFP accumulated in the nucleus and  
206 increased to 54% with the LMB treatment (Fig 3b), agreeing well with our imaging  
207 results (Fig 3a).

208 We also checked whether V2-mediated V1-YFP nuclear export can be affected  
209 by the LMB treatment. Co-expressed with FLAG-V2, V1-YFP had very low

210 accumulation in the nucleus (Fig 1a), but a strong nuclear signal was observed after  
211 treatment with LMB (top panel, -DMSO, Fig 3c), suggesting that V2-mediated V1  
212 protein nucleocytoplasmic shuttling is similar to the V2 protein export, which depends  
213 on exportin- $\alpha$ .

214 To confirm the specific effect of LMB on localizations of the V1 and V2 proteins,  
215 we further infiltrated LMB-treated cells with 0.5% dimethyl sulfoxide (DMSO),  
216 which degrades LMB. As expected, the V1-YFP signal was detected in the nucleus in  
217 the presence of FLAG-V2 and LMB at the beginning of DMSO treatment (top panel,  
218 -DMSO, Fig 3c). However, the V1-YFP signal in the nucleus decreased gradually  
219 after a longer DMSO treatment that eliminated the inhibitory effect of LMB (Fig 3c).

220 To verify the nucleocytoplasmic shuttling of the V1-V2 complex, we performed  
221 a BiFC assay applying the same treatments as above. In the presence of LMB only,  
222 the reconstituted YFP signal was strongly detected in the nucleus (Fig 3d), indicating  
223 that the V1-V2 complex was also present in the nucleus as well as in the cytoplasm  
224 and perinuclear region (Fig 2b). After DMSO treatment for 2 hours, the  
225 nucleus-localized YFP signal clearly diminished, indicating an exportin- $\alpha$ -mediated  
226 nucleocytoplasmic shuttling of the V1-V2 complex (Fig 3d). These results indicated  
227 that the nucleocytoplasmic shuttling of V1 protein is dependent on the V1-V2  
228 interaction and exportin- $\alpha$ .

229

230 **The V2 Mutants C85A Abolishes the V1-V2 Interaction**

231 To verify that the V1-V2 interaction plays a crucial role in the V1 nuclear export  
232 and to identify the approximate sites in V2 that are responsible for the interaction, we  
233 constructed six V2 mutants, each with single or double substitutions (Fig 4a). We then  
234 tested their interactions with V1 protein using the Co-IP assay. Among the six V2  
235 mutants, only the V2<sup>C85A</sup> mutant, which has a cysteine to alanine substitution in the  
236 residue at position 85, was not pulled down along with FLAG-V1 (Fig 4a,4b).  
237 Alanine substitution did not affect expression and stability of the V2<sup>C85A</sup> mutant  
238 because V2-YFP and V2<sup>C85A</sup>-YFP accumulated at similar levels (top Input panel, Fig  
239 4b).

240 It is well-known that V2 protein is involved in PTGS by binding to tomato SGS3  
241 (SISGS3), a homologue of Arabidopsis SGS3 protein [34]. It has been confirmed that  
242 a mutant of V2 (V2<sup>C84A/C86A</sup>) does not interact with SISGS3 and lost its function as a  
243 suppressor of gene silencing [34]. Given the fact that C85 is adjacent to C84 and C86,  
244 it is possible that V2<sup>C85A</sup> may be dysfunctional not only in interacting with V1 protein  
245 but also with SISGS3. To this end, we confirmed that V2<sup>C85A</sup>, but not V2<sup>C84AC86A</sup>,  
246 interacted with SISGS3 in the yeast two-hybrid system (Fig 4c), indicating that the  
247 C85A substitution specifically blocked the V1-V2 interaction but did not disrupt other  
248 functions of the V2 protein, such as the ability to interact with SISGS3 that leads to a  
249 block of host gene silencing-mediated host defense. To further confirm that C85,  
250 rather than C84 and C86, is required for different V2 roles, we also tested the ability  
251 of V2<sup>C84A/C86A</sup> (Fig 4a) to interact with V1 protein. The Co-IP assay indicated that the



252 V2<sup>C84A/C86A</sup> mutant interacted with the V1 protein (Fig 4d). Taken together, the  
253 activities of the V2 protein in interacting with V1 protein and SISGS3 can be  
254 separated, where the C85A mutation blocks V2 protein's interaction with V1 protein  
255 but not with SISGS3.

256

### 257 **The V2<sup>C85A</sup> Mutant Fails to Redistribute the V1 Protein**

258 After confirming that V2<sup>C85A</sup> accumulated well and interacted with SISGS3, we  
259 next checked the localization of V2<sup>C85A</sup> by expressing YFP-tagged V2<sup>C85A</sup>  
260 (V2<sup>C85A</sup>-YFP) in *N. benthamiana*. The fluorescence signal was observed in the  
261 cytoplasm and perinuclear region (Fig 5a), similar to wild-type (wt) V2-YFP, in 56%  
262 of cells expressing V2<sup>C85A</sup>-YFP (Fig 5b). In 44% of cells, however, the fluorescence  
263 signal was more spread than that of V2-YFP and was localized in an elongated region  
264 that does not exactly surround the DAPI-stained nucleus (Fig 5a). The nature of the  
265 localization remains to be determined. The C85A mutation did not affect the  
266 expression and stability of V2-YFP as V2<sup>C85A</sup>-YFP accumulated at a similar level as  
267 V2-YFP (Fig 5c). These results indicated that C85 has some effects on the perinuclear  
268 localization and the nuclear export function of the V2 protein.

269 To test the effect of V2<sup>C85A</sup> on the localization of V1, FLAG- V2<sup>C85A</sup> was  
270 co-expressed with V1-YFP in *N. benthamiana* cells. A strong V1-YFP signal was  
271 detected in the nucleus in the presence of FLAG- V2<sup>C85A</sup>, similar to that when  
272 V1-YFP was expressed alone (Fig 5d). Among 50 cells that were observed for the

273 localization of V1 protein, no obvious difference in the V1-YFP distribution pattern  
274 was observed in the absence or presence of V2<sup>C85A</sup> (Fig 5e), suggesting that V2<sup>C85A</sup>  
275 was not able to affect the nuclear localization of V1 protein. Because V1 protein  
276 accumulated at similar levels in the absence or presence of V2<sup>C85A</sup> (Fig 5f), we  
277 propose that the disrupted V1-V2 interaction is responsible for the failed  
278 redistribution of V1-YFP in the presence of V2<sup>C85A</sup>.

279

## 280 **A C85 Substitution in V2 Protein Delays Viral Systemic Infection**

281 To assess the role of the V1-V2 interaction in viral infection, we constructed an  
282 infectious TYLCV clone with a substitution in the C85 of V2 coding sequence. As V2  
283 ORF overlaps with V1 ORF in the TYLCV genome, mutations in V2 may affect V1  
284 amino acid sequence. To ensure that changes in C85 has no effect on V1 protein in  
285 TYLCV genome, the C85S mutation was introduced into a TYLCV clone to generate  
286 TYLCV-C85S, based on the fact that V2-C85S mutant did not interact with V1  
287 protein (S1a Fig), but interacted with SISGS3 (S1b Fig), and did not affect the  
288 subcellular localization of V1-YFP (S1c Fig). TYLCV-C85S and TYLCV were used  
289 to inoculate *solanum lycopersicum* and *N. benthamiana* plants.

290 Fifteen tomato plants were inoculated with either wt TYLCV or TYLCV-C85S.  
291 Typical symptoms such as chlorosis on leaves were first observed at 16 days post  
292 agro-infection (dpai) on tomato plants inoculated with TYLCV. No obvious  
293 symptoms were observed in the plants inoculated with TYLCV-C85S at 16 dpai (Fig

294 6a). The vast majority of TYLCV-C85S-inoculated tomato plants remained  
295 symptomless even at 32 dpai and only 1-2 plants among 15 eventually developed mild  
296 symptoms eventually, such as leaf yellowing (Fig 6b). Real-time PCR showed that  
297 viral DNA accumulation was much lower in plants inoculated with TYLCV-C85S  
298 than in plants inoculated with wt TYLCV (Fig 6c). Almost no virus particles  
299 accumulated in the TYLCV-C85S-inoculated plants based on a Western blotting  
300 assay using an anti-CP antiserum at 16 dpai (Fig 6d).

301 Similar results were also obtained in TYLCV-C85-inoculated *N. benthamiana*  
302 plants. All wt TYLCV-inoculated plants showed typical symptoms at 22 dpai, such as  
303 leaf yellowing and curling, but only one out of fifteen plants inoculated with  
304 TYLCV-C85S showed mild symptoms (Fig 7a, 7b). Accumulated TYLCV genomic  
305 DNA (Fig 7c) and virus particles (Fig 7d) in systemic leaves of  
306 TYLCV-C85S-inoculated plants were much lower than those in wt  
307 TYLCV-inoculated plants.

308 These results collectively showed that the mutation at C85 of V2 protein caused  
309 significant low levels of virus accumulation in the systemic leaves and dramatic  
310 decrease of the infection efficiency with delayed and mild symptoms.

311

## 312 **Discussion**

313 Because genome replication of geminiviruses takes place in the nucleus of the  
314 infected host cells [5], it is crucial to transport the viral offspring DNAs from the

315 nucleus back to the cytoplasm for intracellular, cell-to-cell, and long-distance  
316 movement. In bipartite geminiviruses, it is well-known that BV1 protein encoded by  
317 the DNA-B component facilitates trafficking of the viral genome into and out of the  
318 host nucleus [6-9, 35]. However, monopartite geminiviruses, which do not contain the  
319 DNA-B component, does not encode BV1 protein. So, the viral DNA shuttling  
320 between the nucleus and the cytoplasm is accomplished by protein or a protein  
321 complex encoded by the DNA-A component. It has been reported that V1 protein of  
322 monopartite geminiviruses mediates the import and export of viral DNA [13, 17, 28].

323         However, V1 protein might not be the only viral protein that is involved in the  
324 nucleocytoplasmic shuttling of TYLCV. Previous reports based on triple  
325 microinjection experiments revealed that the nuclear export of DNA was enhanced  
326 20–30% in the presence of V2 (V2+V1+viral DNA), suggesting that V2 enhances  
327 nuclear export of viral DNA [13]. But the mechanism by which V2 protein promotes  
328 viral DNA export is unclear. We report here that V2 may facilitate viral DNA export  
329 by interacting with V1 and promoting the nuclear export of V1 protein.

330         In this study, we found that V2 protein localized primarily in the perinuclear  
331 region and the cytoplasm (Fig 1b). A very weak signal was also present in the nucleus  
332 (Fig 1b, 1c), but upon treatment with the exportin- $\alpha$  inhibitor LMB, the amount of  
333 nucleus-localized V2 protein increased significantly (Fig 3a), suggesting V2 protein  
334 shuttles between the nucleus and the cytoplasm but is quickly exported out of the  
335 nucleus via exportin- $\alpha$ . It is unclear, however, how V2 imported into the nucleus.

336 Our work indicates that V2 plays a critical role in the nuclear export of V1  
337 protein as the nucleus-localized V1 diminished when V2 was present (Fig 1a).  
338 Supporting this notion, we found that LMB treatment, which prevented V2 from  
339 exporting out of the nucleus (Fig 3a), blocked V2-mediated nuclear export of V1 (Fig  
340 3c). We also showed that the specific V1-V2 interaction is closely related to V1  
341 trafficking. The V1-V2 interaction primarily occurred at the perinuclear region and  
342 the cytoplasm (Fig 2b) but was strongly detected in the nucleus upon LMB treatment  
343 (Fig 3d), suggesting that they may be in a complex or complexes throughout the viral  
344 replication and movement in infected cells. In addition, it also suggested that LMB  
345 only specifically blocked V2's transport out of the nucleus but had no effect on the  
346 V1-V2 interaction. However, our data are not able to determine whether V2 mediates  
347 the nuclear import of V1 protein. In addition, our results do not rule out the possibility  
348 that other viral proteins, such as C4 protein, may also be involved in this process.

349 Cysteine at 85 of V2 was found to be crucial for the V1-V2 interaction because  
350 substitutions of Cys85 with alanine (Fig 4b) or serine (S1a Fig) led to substantially  
351 inhibited interaction with V1 and thus, its ability to facilitate V1's transport out of the  
352 nucleus (Fig 5d, 5e for C85A and S1c Fig for C85S). Because V1 is known for  
353 binding to and facilitating nucleocytoplasmic trafficking of viral DNA [13, 17, 28],  
354 and because V2 facilitates the nuclear export of viral DNA along with V1 [13], we  
355 propose that the V2-promoted nuclear export of viral DNA is via the V1-V2  
356 interaction. Our hypothesis is consistent with our results that the TYLCV-C85S

357 mutant, which has the C85S mutation incorporated into an infectious TYLCV clone,  
358 led to the delayed onset of symptoms with only mild symptoms only in 1-2 tomato or  
359 *N. benthamiana* plants out of a total of 15 (Fig 6a, 6b, 7a, 7b). Real-time PCR and  
360 Western blotting assay results confirmed significant reduction in viral accumulation in  
361 TYLCV-C85S-inoculated plants compared with those plants inoculated by wt  
362 TYLCV (Fig 6c, 6d, 7c, 7d). These results showed that the cysteine at 85 of V2 was  
363 very important for viral systemic infection. The mutant on C85 caused V2 to lose its  
364 ability to bind with V1 and lead to V2 being unable to help with V1 accumulation at  
365 the perinuclear region nor participate in V1-mediated nuclear export of viral genomic  
366 DNA, which eventually affected the viral systemic infection.

367 In monopartite geminiviruses, V2 is a multifunctional protein that is involved in  
368 suppressing host PTGS and TGS, pathogenicity and systemic infection [5,30,31,32].  
369 Substitution in cysteine 85 may affect functions other than its interaction with V1,  
370 especially since both Cys84 and Cys86 are critical for interacting with SISGS3 and  
371 the suppression of gene silencing [34]. We found that even though the C85A (Fig 4b)  
372 and C85S (S1a Fig) mutants failed to interact with V1 protein and thus, V1's  
373 trafficking out of the nucleus (Fig 5d, 5e, S1c), but both interacted with SISGS3 (Fig  
374 4c, S1b), suggesting that C85A and C85S mutants maintain their activity as gene  
375 silencing suppressors. These results also are consistent with the notion that the C85S  
376 mutation delays viral systemic infection by affecting V1-mediated viral genomic  
377 DNA transportation from the nucleus to the cytoplasm, not by disturbing gene

378 silencing-mediated host defense. However, we cannot totally rule out the possibility  
379 that other V2-mediated viral infection step(s) besides viral DNA trafficking are  
380 affected by the C85S mutation.

381 Our data also showed that the C84A/C86A double mutant interacted with V1  
382 (Fig 4d) but not SISGS3 (Fig 4c), indicating that C84 and C86 are not related to V2's  
383 ability to interact with V1. Our results therefore revealed that motifs responsible for  
384 V1's nuclear export and gene silencing suppressor activity are independent from one  
385 another.

386 Our results indicate that V2 binds to V1 protein and facilitate the nuclear export  
387 of V1. During TYLCV infection, V1 mediates both nuclear import and export of viral  
388 DNA. The equilibrium between nuclear targeting and nuclear egress is changed upon  
389 completion of replication and the V1-V2 interaction can improve the nuclear export of  
390 the V1-DNA complex. Thus, viral DNA will be preferentially transported out of the  
391 nucleus for subsequent infection events. In the presence of the V2<sup>C85S</sup> mutant, the  
392 nuclear export of V1 is slowed down or eliminated and therefore, viral DNA and  
393 subsequent viral cell-to-cell and systemic movement is delayed. However, we cannot  
394 totally rule out that the V1-V2 complex is also required for intracellular, cell-to-cell,  
395 and/or long-distance movement besides nuclear export of V1 protein and  
396 V1-mediated viral offspring DNAs.

397 Based on our findings here, we propose a working model for the role of V2 in  
398 V1-mediated nuclear export of TYLCV genomic DNA (Fig 8). When offspring viral

399 genomic DNA are produced in the nucleus, they are bound by V1 [29]. A V2-V1-viral  
400 DNA complex is subsequently formed via a specific interaction between V1 and V2  
401 and, with the help of exportin- $\alpha$ , V2 facilitates the V1-viral DNA complexes to egress  
402 from the nucleus to the perinucleus and the cytoplasm with an enhanced efficiency.  
403 Eventually TYLCV then spreads to adjacent cells and upper leaves, which results in a  
404 systemic infection. The infection efficiency and the accumulation of TYLCV in the  
405 systemic leaves are dramatically decreased without a defective V2-V1 interaction.

406 In summary, our results revealed that one mechanism of V2 protein's  
407 involvement in viral DNA transportation is to promote V1-mediated viral  
408 transportation from the nucleus to the perinuclear region and the cytoplasm, which is  
409 with a specific interaction with V1, form V2-V1-viral DNA complex, and via host  
410 exportin- $\alpha$ . However, whether V2 promotes the ability of V1 to bind viral DNA and  
411 whether the V1-V2 interaction works after nuclear transportation require further  
412 research.

413

## 414 **Materials and Methods**

### 415 **Plant Materials and Growth Conditions**

416 Transgenic *Nicotiana benthamiana* plants expressing a nuclear marker,  
417 H2B-RFP (red fluorescent protein fused to the C terminus of histone 2B) [36], were  
418 kindly provided by Dr. Xiaorong Tao (Nanjing Agricultural University, Nanjing,  
419 China).



420 All agro-infiltration experiments were performed in wild-type (wt) or H2B-RFP  
421 transgenic *N. benthamiana*. Plants were grown in a growth chamber  
422 (ModelGXZ500D, Jiangnan Motor Factory, Ningbo, China) at 26°C (16 h, light) and  
423 22°C (8 h, dark) for 4-6 weeks before being infiltrated with the agrobacterium. After  
424 infiltration, the plants were kept under the same growth conditions.

#### 425 **Plasmid Construction**

426 The coding sequences of TYLCV V2 and V1 genes were amplified from the  
427 cDNA of a TYLCV-infected tomato plant from Jiangsu Province, China (GenBank  
428 accession number GU111505) [37], using corresponding primers (S1 Table).

429 Site-specific mutants of V2<sup>G70A</sup>, V2<sup>S71A</sup>, V2<sup>K73A</sup>, V2<sup>C85A</sup>, V2<sup>C84AC86A</sup>, V2<sup>C85S</sup>, V2<sup>T96A</sup>  
430 were synthesized (Invitrogen, China) and confirmed by sequencing (Fig 4a).

431 To investigate the subcellular localization, the TYLCV V2 (*BgIII*), V1 genes  
432 (*BamHI*) and V2<sup>C85A</sup>, V2<sup>C84AC86A</sup>, V2<sup>C85S</sup> were amplified using specific primers  
433 (Supplementary Table S1). Yellow fluorescent protein (YFP) tag was inserted  
434 between the CaMV 35S promoter and the 35S terminator (35St) in the pCambia1300  
435 binary vector to construct the p1300-YFP vector as previously described [38]. Then,  
436 amplified products were individually inserted either into the *BamHI* or *BgIII*  
437 (compatible with *BamHI*) site of the p1300-YFP vector to fuse in frame with YFP at  
438 the N-terminus or C-terminus to generate V2-YFP, V1-YFP, YFP-V2 and  
439 V2<sup>C85A</sup>-YFP, V2<sup>C84AC86A</sup>-YFP, V2<sup>C85S</sup>-YFP.

440 To make BiFC vectors, full-length coding sequences of V2 and V1 genes were  
441 amplified using the primers listed in Supplemental Table S1, then V1 was cloned into  
442 the *Bam*HI site as a fusion with the N-terminal fragment of YFP and V2 was cloned  
443 into the *Bam*HI site as a fusion with the C-terminal fragment of YFP, resulting in  
444 nYFP-V1 and cYFP-V2.

445 FLAG tagged V2 and V1 were amplified by PCR using specific primers (S1  
446 Table) and inserted into the *Bam*HI site between the 35S promoter and the 35St in the  
447 pCambia1300 binary vector to generate FLAG-V2 and FLAG-V1 for the further  
448 Co-IP experiments.

449 For the yeast two-hybrid assay, V2, V2<sup>C85A</sup>, V2<sup>C84AC86A</sup>, V2<sup>C85S</sup> were amplified  
450 and inserted into the *Nde*I/*Eco*RI-digested pGADT7 vector and SISGS3 was cloned  
451 into the *Nde*I/*Bam*HI-digested pGBDT7 vector.

#### 452 **Agro-infiltration Assays in *N. benthamiana***

453 Target vectors were transformed into *A. tumefaciens* strain GV3101 by  
454 electroporation. Agrobacterial cultures were harvested when the OD600 was  
455 approximately 0.8–1.0, collected by centrifugation, resuspended in the induction  
456 buffer (10 mM MgSO<sub>4</sub>, 100 mM 2-N-morpholino ethanesulfonic acid [pH 5.7], 2  
457 mM acetosyringone), and incubated for 2 h at room temperature. The suspensions  
458 were then adjusted to OD600=0.5 and infiltrated into 4- to 6-week-old wt *N.*  
459 *benthamiana* or H2B-RFP transgenic *N. benthamiana* leaves for the further  
460 experiments.

## 461 **Subcellular Localization of Proteins**

462 P1300-YFP, YFP-V2, V2-YFP, V1-YFP, V2<sup>C84AC86A</sup> and V2<sup>C85A</sup>-YFP were  
463 individually introduced into *A. tumefaciens* strain GV3101 through electroporation.  
464 Leaves of 4-week-old *N. benthamiana* plants were infiltrated with *A. tumefaciens*  
465 harbouring the designated constructs. At 40 hours post infiltration (hpi), plants leaves  
466 were excised and YFP fluorescence was examined in epidermal cells using confocal  
467 microscopy (Zeiss LSM 880). The microscope was configured with a 458–515 nm  
468 dichroic mirror for dual excitation and a 488-nm beam splitter to help separate YFP  
469 fluorescence.

## 470 **Bimolecular Fluorescence Complementation (BiFC) Assay**

471 BiFC experiments were performed as previously described [39] with minor  
472 modifications. nYFP-V1 and cYFP-V2 were introduced individually into *A.*  
473 *tumefaciens* strain GV3101 by electroporation. After overnight growth and activation,  
474 agrobacterium cultures were combined and infiltrated into leaves of *N. benthamiana*  
475 as above. After agroinfiltration, *N. benthamiana* plants were grown in a growth  
476 chamber with a 16 h light/8 h dark cycle. YFP fluorescence was observed and  
477 photographed by using confocal microscopy (Zeiss LSM 710) at 48 hpi. YFP was  
478 observed under a mercury lamp light using a 488-nm excitation filter. Photographic  
479 images were prepared using ZEN 2011SP1.

## 480 **Co-Immunoprecipitation**

481 The Co-IP assay was performed as previously described [38]. 40 h after  
482 infiltration, *N. benthamiana* leaves were harvested and ground in liquid nitrogen.  
483 Proteins were extracted in IP buffer (40 mM Tris-HCl at pH 7.5, 100 mM NaCl, 5  
484 mM MgCl<sub>2</sub>, 2 mM EDTA, 2×EDTA-free proteinase inhibitor, 1 mM PMSF, 4 mM  
485 DTT, 1% glycerol, and 0.5% Triton-X100). After centrifugation, the supernatant was  
486 mixed with FLAG-conjugated beads (Sigma, USA). After 1 h incubation at 4°C, the  
487 beads were washed six times with IP buffer, resuspended in 2×SDS gel loading buffer,  
488 and boiled for 10 min. The samples were loaded onto a 12% (vol/vol) SDS/PAGE gel  
489 and target proteins were detected using a polyclonal anti-GFP antibody (GenScript,  
490 USA) or a monoclonal anti-FLAG (Sigma, USA) antibody.

#### 491 **Yeast Two-Hybrid Assay**

492 The yeast two-hybrid system was used to examine interactions between V2,  
493 V2<sup>C85A</sup>, V2<sup>C84AC86A</sup> and SISGS3. V2, V2<sup>C85A</sup>, and V2<sup>C84AC86A</sup> were cloned into the  
494 activation domain (AD)-containing vector and SISGS3 was cloned into the vector  
495 harboring the DNA binding domain (BD). Both constructs were transformed into  
496 *Saccharomyces cerevisiae* strain AH109. The plasmid pairs BD-53 and AD-recT  
497 served as a positive controls, while the plasmid pairs BD-Lam and AD-recT were  
498 used as a negative controls. Transformants were grown at 30°C for 72 h on  
499 SD/-His/-Leu/-Trp/ synthetic medium to test for protein-protein interaction.

#### 500 **Nuclear-Cytoplasmic Fractionation Assay**

501 Nuclear-cytoplasmic fractionation assays were performed as described  
502 previously [40] with minor modifications. Infiltrated leaves were harvested and mixed  
503 with 2 mL/g of lysis buffer (20 mM Tris-HCl, pH 7.5, 20 mM KCl, 2 mM EDTA, 2.5  
504 mM MgCl<sub>2</sub>, 25% glycerol, 250 mM Sucrose, 5 mM DTT and 10 mM protease  
505 inhibitor). The homogenate was filtered through a double layer of Miracloth. The  
506 supernatant, consisting of the cytoplasmic fraction, was centrifuged at 10,000 rpm for  
507 10 min at 4°C and collected. The pellet was resuspended with 500 µL of NRB2 (20  
508 mM Tris-HCl, pH 7.5, 0.25 M Sucrose, 10 mM MgCl<sub>2</sub>, 0.5% Triton X-100, 5 mM  
509 b-mercaptoethanol and 10 mM protease inhibitor) and overlaid on top of 500 µL  
510 NRB3 (20 mM Tris-HCl, pH 7.5, 1.7 M Sucrose, 10 mM MgCl<sub>2</sub>, 0.5% Triton X-100,  
511 5 mM b-mercaptoethanol and 10 mM protease inhibitor). These were centrifuged at  
512 12,000 rpm for 40 min at 4°C. The final nuclear pellet was resuspended in 400 µL  
513 lysis buffer. As quality controls for the fractionation assays, PEPC protein and  
514 H2B-RFP were used as a cytoplasmic and a nuclear marker, respectively.

### 515 **Leptomycin B Treatment Assays**

516 Leptomycin B (LMB) Treatment Assays were performed as previously described  
517 [19] with minor modifications. LMB (Fisher Scientific, USA) was dissolved in  
518 ethanol to prepare 10 mM stock solutions. For *in vivo* treatment of *N. benthamiana*  
519 leaves, stock solutions were diluted in water to prepare solutions of 10 nM LMB.  
520 Agroinfiltrated *N. benthamiana* leaves expressing the protein of interest at 40 hpi  
521 were infiltrated with 10 nM LMB. 2 h after LMB treatment, the leaves were cut and

522 mounted on a glass slide for confocal imaging. When needed, DMSO was further  
523 infiltrated into LMB-treated leaves and tissues were harvested at the specified time  
524 points, namely 1, 1.5, and 2 h.

#### 525 **TYLCV constructs for Agrobacterium-mediated inoculation**

526 For the construction of infectious clones of TYLCV containing V2<sup>C85S</sup>, a full  
527 length TYLCV mutant, TYLCV-C85S (the cysteine residue on V2 at amino acid 85  
528 was changed to serine), was synthesized (Invitrogen, China). Then the full DNA-A of  
529 TYLCV-C85S was amplified using the primers listed in S1 Table and inserted into  
530 the pGEM-T Easy (Promega, USA) vector to produce pGEM-1A-C85S. After  
531 sequence confirmation, a 2183 nucleotide (nt) fragment was excised from pGEM-1A  
532 with *Bam*HI and *Sac*I, then subcloned into the *Bam*HI-*Sac*I sites of the binary vector  
533 pBinPLUS to produce pBinPLUS-0.8A. The full-length of TYLCV-C85S was  
534 digested from pGEM-1A with *Bam*HI and inserted into pBinPLUS-0.8A at its  
535 unique *Bam*HI site to get pBinPLUS-1.8A, the infectious clone of TYLCV-C85S. The  
536 wt TYLCV infectious clone was constructed as previously described [38].

537 *Agrobacterium* cultures harboring TYLCV constructs were injected into the stem  
538 of *S. lycopersicum* and *N. benthamiana* with a syringe. Inoculated plants were grown  
539 in an insect-free cabinet with supplementary lighting corresponding to a 16-h day  
540 length.

#### 541 **RNA extraction and qRT-PCR analysis**

542 Total RNA was extracted from mock (*Agrobacterium*-carrying empty vector)-,  
543 wt TYLCV- or TYLCV-C85S-infiltrated *S. lycopersicum* or *N. benthamiana* leaves at  
544 different time periods using the Trizol Reagents (Life technologies, USA) and treated  
545 with DNase I following the manufacturer's instructions (PrimeScript RT reagent Kit  
546 with gDNA Erase, Takara, Japan). cDNA synthesized from reverse transcription of  
547 RNA samples was used to determine the mRNA expression levels of target genes as  
548 well as for quantifying TYLCV accumulation levels at the date indicated. *SlActin* or  
549 *NbActin* was used as an internal control for tomato or *N. benthamiana*, respectively.

550

## 551 **Acknowledgements**

552 We thank Dr. Sue Tolin (Virginia Tech, USA) and Dr. Janet Webster (Virginia  
553 Tech, USA) for critical reading of the manuscript. We are grateful to Xiaorong Tao  
554 (Nanjing Agricultural University, China) for kindly providing the H2B-RFP  
555 transgenic *N. benthamiana*.

556

## 557 **References**

- 558 1. Gafni Y. Tomato yellow leaf curl virus, the intracellular dynamics of a plant DNA virus.  
559 *Mol. Plant Pathol.* 2003; 4: 9-15.
- 560 2. Moriones E, Navas-Castillo J. Tomato yellow leaf curl virus, an emerging virus complex  
561 causing epidemics worldwide. *Virus Res.* 2000; 71: 123-134.
- 562 3. Nakhla MK, Maxwell DP. Epidemiology and management of tomato yellow leaf curl

- 563 disease. *Plant Virus Dis. Control* 1997; 43: 565-583.
- 564 4. Glick E, Levy Y, Gafni Y. The viral etiology of Tomato yellow leaf curl disease-a review.  
565 *Plant Prot. Sci.* 2009; 45: 81-97.
- 566 5. Hanley-Bowdoin L, Bejarano ER, Robertson D, Mansoor S. Geminiviruses: masters at  
567 redirecting and reprogramming plant processes. *Nat. Rev. Microbiol.* 2013; 11: 777-788.
- 568 6. Brough CL, Hayes RJ, Morgan AJ, Coutts RHA, Buck KW. Effects of mutagenesis in  
569 vitro on the ability of cloned tomato golden mosaic virus DNA to infect *Nicotiana*  
570 *benthamiana* plants. *J. Gen. Virol.* 1988; 69: 503-514.
- 571 7. Etesami P, Callis R, Ellwood S, Stanley J. Delimitation of essential genes of cassava  
572 latent virus DNA 2. *Nucleic Acids Res.* 1988; 16: 4811-4829.
- 573 8. Jeffrey JL, Pooma W, Petty ITD. Genetic requirements for local and systemic movement  
574 of tomato golden mosaic virus in infected plants. *Virology* 1996; 223: 208-218.
- 575 9. Sudarshana MR, Wang HL, Lucas WJ, Gilbertson RL. Dynamics of bean dwarf mosaic  
576 geminivirus cell-to-cell and long-distance movement in *Phaseolus vulgaris* revealed,  
577 using the green fluorescent protein. *Mol. Plant Microbe Interact.* 1998; 11: 277-291.
- 578 10. Padidam M, Beachy RN, Fauquet CM. Tomato leaf curl geminivirus from India has a  
579 bipartite genome and coat protein is not essential for infectivity. *J. Gen. Virol.* 1995; 76:  
580 25-35.
- 581 11. Lazarowitz SG, Beachy RN. Viral movement proteins as probes for intracellular and  
582 intercellular trafficking in plants. *Plant Cell* 1999; 11: 535-548.
- 583 12. Liu H, Boulton MI, Oparka KJ, Davies JW. Interaction of the movement and coat proteins



- 584 of Maize streak virus: implications for the transport of viral DNA. *J. general*  
585 *virology* 2001; 82(1): 35-44.
- 586 13. Rojas MR, Jiang H, Salati R, Xoconostle-Cazares B, Sudarshana MR, Lucas WJ, et al.  
587 Functional analysis of proteins involved in movement of the monopartite begomovirus,  
588 Tomato yellow leaf curl virus. *Virology* 2001; 291(1): 110-125.
- 589 14. Gafni Y, Epel BL. The role of host and viral proteins in intra- and inter-cellular trafficking  
590 of geminiviruses. *Mol. Plant Pathol.* 2002; 60(5): 231-241.
- 591 15. Boulton MI, Pallaghy CK, Chatani M, MacFarlane S, Davies JW. Replication of Maize  
592 streak virus mutants in maize protoplasts: evidence for a movement protein. *Virology*  
593 1993; 192(1): 85-93.
- 594 16. Boulton MI, Steinkellner J, Donson J, Markham PG, King DI, Davies JW. Mutational  
595 analysis of virion-sense genes of maize streak virus. *J. Gen. Virol.* 1989; 70: 2309-2323.
- 596 17. Kunik T, Mizrachy L, Citovsky V, Gafni Y. Characterization of a tomato karyopherin that  
597 interacts with the Tomato yellow leaf curl virus (TYLCV) capsid protein. *J. Exp. Bot.*  
598 1999; 50: 731-732.
- 599 18. Yaakov N, Levy Y, Belausov E, Gaba V, Lapidot M, Gafni Y. Effect of a single amino  
600 acid substitution in the NLS domain of Tomato yellow leaf curl virus-Israel (TYLCV-IL)  
601 capsid protein (CP) on its activity and on the virus life cycle. *Virus Res.* 2011; 158(1-2):  
602 8-11.
- 603 19. Mei Y, Wang Y, Hu T, Yang X, Lozano-Duran R, Sunter G, et al. Nucleocytoplasmic  
604 shuttling of geminivirus C4 protein Mediated by phosphorylation and myristoylation is

- 605 critical for viral pathogenicity. *Mol. plant* 2018; 11(12): 1466-1481.
- 606 20. Rojas MR, Hagen C, Lucas WJ, Gilbertson RL. Exploiting chinks in the plant's armor:  
607 evolution and emergence of Geminiviruses. *Annu. Rev. Phytopathol.* 2005; 43(1):  
608 361-394.
- 609 21. Navot N, Pichersky E, Zeidan M, Zamir D, Czosnek H. Tomato yellow leaf curl virus: A  
610 whitefly-transmitted geminivirus with a single genomic component. *Virology* 1991; 185:  
611 151-161.
- 612 22. Diazpendon JA, Canizares MC, Moriones E, Bejarano ER, Czosnek H, Navas-castillo J.  
613 Tomato yellow leaf curl viruses: ménage a trois between the virus complex, the plant and  
614 the whitefly vector. *Mol. Plant Pathol.* 2010; 11(4): 441-450.
- 615 23. Scholthof KBG, Scott A, Henryk C, Palukaitis P, Jacquot E, Hohn T, et al. Top 10 plant  
616 viruses in molecular plant pathology. *Mol. Plant Pathol.* 2011; 12(9): 938-944.
- 617 24. Zrachya A, Glick E, Levy Y, Arazi T, Citovsky V, Gafni Y. Suppressor of RNA silencing  
618 encoded by Tomato yellow leaf curl virus-Israel. *Virology* 2007; 358(1): 159-165.
- 619 25. Wang B, Li F, Huang C, Yang X, Qian Y, Xie Y, et al. V2 of tomato yellow leaf curl virus  
620 can suppress methylation-mediated transcriptional gene silencing in plants. *J. Gen. Virol.*  
621 2014; 95(1): 225-230.
- 622 26. Barziv A, Levy Y, Hak H, Mett A, Belausov E, Citovsky V, et al. The (TYLCV) V2  
623 protein interacts with the host papain-like cysteine protease CYP1. *Plant Signal. Behav.*  
624 2012; 7(8): 983-989.
- 625 27. Wartig L, Kheyr PA, Noris E, Kouchkovsky FD, Jouanneau F, Gronenborn B, et al.

- 626 Genetic analysis of the monopartite tomato yellow leaf curl geminivirus: roles of V1, V2,  
627 and C2 ORFs in viral pathogenesis. *Virology* 1997; 228(2): 132-140.
- 628 28. Kunik T, Palanichelvam K, Czosnek H, Citovsky V, Gafni Y. Nuclear import of the capsid  
629 protein of Tomato yellow leaf curl virus (TYLCV) in plant cells. *Plant J.* 1998;13:  
630 393-399.
- 631 29. Palanichelvam K, Kunik T, Citovsky V, Gafni Y. The capsid protein of tomato yellow leaf  
632 curl virus binds cooperatively to single-stranded DNA. *J. Gen. Virol.* 1998; 79 (11):  
633 2829-2833.
- 634 30. Fondong VN. Geminivirus protein structure and function. *Mol. Plant Pathol.* 2013; 14:  
635 635-649.
- 636 31. Jeske H. Geminiviruses. *Curr. Top. Microbiol. Immunol.* 2009; 331: 185-226.
- 637 32. Sahu PP, Sharma N, Puranik S, Muthamilarasan M, Prasad M. Involvement of host  
638 regulatory pathways during geminivirus infection: a novel platform for generating durable  
639 resistance. *Funct. Integr. Genomics* 2014; 14: 47-58.
- 640 33. Mathew C, Ghildyal R. CRM1 inhibitors for antiviral therapy. *Frontiers in*  
641 *microbiology* 2017; 8: 1171.
- 642 34. Glick E, Levy Y, Gafni Y. The viral etiology of Tomato yellow leaf curl disease-a review.  
643 *Plant Prot. Sci.* 2009; 45: 81-97.
- 644 35. Ye J, Yang J, Sun Y, Zhao P, Gao S, Jung C, et al. Geminivirus activates ASYMMETRIC  
645 LEAVES 2 to accelerate cytoplasmic DCP2-mediated mRNA turnover and weakens RNA  
646 silencing in *Arabidopsis*. *PLoS Pathog.* 2015; 11(10): e1005196.

- 647 36. Martin K, Kopperud K, Chakrabarty R, Banerjee R, Brooks R, Goodin MM. Transient  
648 expression in *Nicotiana benthamiana* fluorescent marker lines provides enhanced  
649 definition of protein localization, movement and interactions in planta. *Plant J.* 2009; 59:  
650 150–162.
- 651 37. Ji Y, Xiong R, Cheng Z, Zhou T, Zhao T, Yu W, et al. Molecular diagnosis of Tomato  
652 yellow leaf curl disease in Jiangsu province. *Acta Hortic.* 2008; 35(12): 1815-1818.
- 653 38. Zhao W, Ji Y, Wu S, Ma X, Li S, Sun F, et al. Single amino acid in V2 encoded by  
654 TYLCV is responsible for its self-interaction, aggregates and pathogenicity. *Sci. Rep.*  
655 2018, 8(1).
- 656 39. Shen Q, Liu Z, Song F, Xie Q, Hanley-Bowdoin L, Zhou X. Tomato SlSnRK1 protein  
657 interacts with and phosphorylates  $\beta$ C1, a pathogenesis protein encoded by a geminivirus  
658  $\beta$ -satellite. *Plant Physiol.* 2012; 157(7): 1394-406.
- 659 40. Wang W, Ye R, Xin Y, Fang X, Li C, Shi H, et al. An importin  $\beta$  protein negatively  
660 regulates microRNA activity in *Arabidopsis*. *Plant Cell* 2011; 23(10): 3565-3576.

661

## 662 **Additional Information**

663

## 664 **Funding**

665 This study was financially supported by grants from the National Key R&D  
666 Program of China (No. 2018YFD0201208), Jiangsu Agriculture Science and  
667 Technology Innovation Fund [No. CX(18)2005], China Agriculture Research System

668 (No. CARS-24-C-01), National Natural Science Foundation of China (No. 31572074,  
669 31770168) and Jiangsu Academy of Agricultural Sciences Fund (No. 6111614).

670

### 671 **Author contributions**

672 Y.Z., Y.J., X.W. and W.Z. designed the project. W.Z., S.W. and E.B. conducted  
673 experiments. All authors analyzed the data and reviewed the manuscript. W.Z., Y.J.  
674 and X.W. wrote the paper.

675

### 676 **Competing financial interests**

677 The authors declare no competing financial interests.

678

### 679 **Supporting Information**

680

#### 681 **S1 Table Primers used in this study**

|   | Designation | Sequence(5' to 3')                    | Assay                          |
|---|-------------|---------------------------------------|--------------------------------|
| 1 | V1-bF       | CGGGATCCATGTCGAAGCGACCAGGCG<br>A      | V1-YFP,<br>nYFP-V1             |
| 2 | V1-bR       | CGGGATCCATTTGATATTGAATCATAG<br>AAATAG | V1-YFP,<br>nYFP-V1,<br>FLAG-V1 |
| 3 | FLAG-V1-F   | CGGGATCCATGGATTACAAGGATGATG           | FLAG-V1                        |

|   |           |                                                            |                                                                                           |
|---|-----------|------------------------------------------------------------|-------------------------------------------------------------------------------------------|
|   |           | ATGATAAGTCGAAGCGACCAGGCGA                                  |                                                                                           |
| 4 | V2-bgF    | GAAGATCTATGTGGGATCCACTTCTAA<br>AT                          | V2-YFP,<br>cYFP-V2,<br>V2 <sup>C85A</sup> -YFP                                            |
| 5 | V2-bgR    | GAAGATCTGGGCTTCGATACATTCTGTA<br>T                          | V2-YFP,<br>cYFP-V2,<br>V2 <sup>C85A</sup> -YFP,<br>FLAG-V2,<br>FLAG-V2 <sup>C85A</sup>    |
| 6 | FLAG-V2-F | GAAGATCTATGGATTACAAGGATGATG<br>ATGATAAGTGGGATCCACTTCTAAATG | FLAG-V2,<br>FLAG-V2 <sup>C85A</sup>                                                       |
| 7 | TY-V2-F   | CGCCATATGATGTGGGATCCACTTCTAA<br>AT                         | AD-V2,<br>AD-V2 <sup>C85A</sup> ,<br>AD-V2 <sup>C85S</sup> ,<br>AD-V2 <sup>C84AC86A</sup> |
| 8 | TY-V2-R   | CGGAATTCTCAGGGCTTCGATACATTCT                               | AD-V2,<br>AD-V2 <sup>C85A</sup> ,<br>AD-V2 <sup>C85S</sup> ,<br>AD-V2 <sup>C84AC86A</sup> |
| 9 | TY-1A-KF  | GGGGTACCACTTCTAAATGAATTCCTG                                | TYLCV-C85S                                                                                |

|    |          |                                     |            |
|----|----------|-------------------------------------|------------|
|    |          | AATCTG                              |            |
| 10 | TY-1A-BR | CGGGATCCCACATAGTGCAAGACAAAC<br>T    | TYLCV-C85S |
| 11 | SISGS3-F | CGCCATATGAGTTTCAGCAAATGGGGT<br>GGG  | BD-SISGS3  |
| 12 | SISGS3-R | CGGGATCTCACATGGTGCCACTGCTATT<br>GAC | BD-SISGS3  |

682

683 **S1 Fig** (a) Co-IP assay showing that V2<sup>C85S</sup> does not interact with V1 protein. The  
684 Co-IP assay was performed as in Fig 2a. (b) Analysis of the interaction between  
685 SISGS3 and wt V2 or the V2<sup>C85S</sup> mutant in the yeast two-hybrid assay. The Y2H  
686 assay was performed as in Fig 4c. (c) Subcellular localization of V1 protein that was  
687 co-expressed with FLAG-V2<sup>C85S</sup> in *N. benthamiana* cells. DAPI stains DNA in the  
688 nucleus. Bars: 20  $\mu$ m. Both V1-YFP and FLAG-V2<sup>C85S</sup> are expressed well as shown  
689 by Western blot analysis.

690

## 691 **Figures**

692 **Fig 1** The effect of V2 protein on the nuclear distribution of V1 protein. (a) The  
693 localization of V1 protein in the absence or presence of V2 protein in *N. benthamiana*  
694 cells. V1-YFP was expressed in the absence or presence of FLAG-V2 and was  
695 detected either by confocal microscopy (left panel) or by Western blotting using an

696 anti-GFP polyclonal antibody (right panel). DAPI stains DNA in the nucleus. Actin  
697 serves as a control for equal loading of total lysates. Bars: 50  $\mu$ m. (b) The localization  
698 of V2 in *N. benthamiana* cells. The expressed YFP or YFP-V2 in epidermal cells of *N.*  
699 *benthamiana* leaves was detected either by confocal microscopy (left panel) or by  
700 Western blotting using an anti-GFP polyclonal antibody (right panel). DAPI stains  
701 DNA in the nucleus. Bars: 50  $\mu$ m. (c) Nuclear-cytoplasmic fractionation assay of the  
702 distribution of V1 protein in the absence or presence of FLAG-V2 in H2B-RFP  
703 transgenic *N. benthamiana* plants. Nuclei were purified from plant tissues expressing  
704 V1-YFP in the absence or presence of FLAG-V2 using percoll density gradient  
705 centrifugation. Western blot analysis was conducted with antibodies specific to the  
706 indicated proteins using an anti-GFP polyclonal antibody or an anti-FLAG  
707 monoclonal antibody. PEPC was used as a marker for the cytoplasmic fraction and  
708 H2B-RFP was used as a marker for the nuclear fraction. Protein signal intensity was  
709 measured by using Adobe Photoshop CS6, with the cytoplasm plus the nucleus levels  
710 totaling as 100%.

711

712 **Fig 2** Identification of the interaction between V2 and V1 proteins. (a)

713 Co-immunoprecipitation (Co-IP) analysis of the interaction between FLAG-V2 and  
714 V1-YFP. *N. benthamiana* leaves were co-infiltrated with *A. tumefaciens* cells  
715 harbouring expression vectors to express FLAG-V2 and V1-YFP (Lane 1), FLAG-V2  
716 and YFP (Lane 2), or V1-YFP alone (Lane 3). Cell lysates were incubated with



717 FLAG-trap beads (Sigma, USA). Samples before (Input) and after (IP)  
718 immunoprecipitation were analyzed by immunoblotting using anti-GFP or -FLAG  
719 antibody. (b) BiFC assays between V1 and V2 proteins in the leaves of *N.*  
720 *benthamiana*. Confocal imaging was performed at 48 hpi. V1 and V2 were fused to  
721 the N (nYFP) and C-terminal (cYFP) fragments of YFP, respectively. The V1-V2  
722 interaction will lead to a reconstituted fluorescence signal. DAPI stains DNA in the  
723 nucleus. Bars: 50  $\mu$ m.  
724  
725 **Fig 3** The V2-mediated nuclear export of V1 protein is dependent on exportin- $\alpha$ . (a)  
726 Subcellular distribution of V2-YFP without or with the LMB treatment in H2B-RFP  
727 transgenic *N. benthamiana* plants. Leaf tissues were first agroinfiltrated with V2-YFP  
728 for 40 hours and followed by 10 nM LMB for 2 hours. H2B-RFP signal represents the  
729 nucleus. Bars: 50  $\mu$ m. (b) Nuclear-cytoplasmic fractionation analysis of the  
730 distribution of V2 with or without LMB treatment in H2B-RFP transgenic *N.*  
731 *benthamiana* cells. Western blot analysis was conducted with antibodies specific to  
732 the indicated proteins. PEPC was used as a marker for the cytoplasmic fraction and  
733 H2B-RFP as a marker for the nuclear fraction. Protein signal intensity was measured  
734 by using Adobe Photoshop CS6, the sum of cytoplasm plus the nucleus as 100%. (c)  
735 Subcellular distribution of V1-YFP co-expressed with FLAG-V2 upon the treatment  
736 of LMB and DMSO in H2B-RFP transgenic *N. benthamiana* plants. Leaf tissues  
737 expressing V2-YFP and FLAG-V2 were first infiltrated with 10 nM LMB for 2 hours

738 followed by infiltration of 0.5% DMSO to degrade LMB. YFP signal was observed at  
739 specific time points as indicated. Arrows indicate the V1-YFP signal in or around the  
740 nucleus at different time points after the treatment with LMB and DMSO. H2B-RFP  
741 signal represents the nucleus. Bars: 50  $\mu$ m. (d) Effects of the LMB treatment on the  
742 V1-V2 interaction as shown by BiFC in epidermal cells of H2B-RFP transgenic *N.*  
743 *benthamiana* plants. Plant tissues co-expressing nYFP-V1 with cYFP-V2 were treated  
744 with LMB for 2 h to inactivate exportin- $\alpha$  and then infiltrated with 0.5% DMSO to  
745 degrade LMB. Confocal micrographs were taken at different time points after DMSO  
746 treatment, as indicated. Arrow indicates localizations of the V1-V2 complex export  
747 from the nucleus. Nuclei of *N. benthamiana* leaf epidermal cells are indicated by the  
748 expression of the H2B-RFP transgene (red). Bars: 50  $\mu$ m.

749

750 **Fig 4** Identification of the critical sites in V2 protein that are responsible for the  
751 V1-V2 interaction. (a) Schematic illustration of the V2 protein. Nucleic acid and  
752 amino acids sequences of V2 mutants, V2<sup>G70A</sup>, V2<sup>S71A</sup>, V2<sup>K73A</sup>, V2<sup>C85A</sup>, V2<sup>C84AC86A</sup>,  
753 and V2<sup>T96A</sup> are shown. (b) Co-IP assay to demonstrate the interaction between V1 and  
754 wt V2 or V2<sup>C85A</sup>. The Co-IP assay was performed as in Fig 2a. (c) Yeast-two hybrid  
755 (Y2H) detecting possible interactions between SISGS3 and V2<sup>C85A</sup> or V2<sup>C84AC86A</sup>.  
756 V2<sup>C85A</sup> and V2<sup>C84AC86A</sup> were fused with a GAL4 activation domain (AD-V2<sup>C85A</sup> and  
757 AD-V2<sup>C84AC86A</sup>), and SISGS3 was fused to a GAL4-binding domain (BD-SISGS3),  
758 respectively. AH109 cells co-transformed with the indicated plasmids were subjected

759 to 10-fold serial dilutions and plated on synthetic defined medium SD/-His/-Leu/-Trp  
760 medium to screen for positive interactions at 3 days after transformation. Yeast cells  
761 co-transformed with AD-T+BD-53 serves as a positive control; yeast cells  
762 co-transformed with AD-T+BD-Lam as a negative controls. (d) Co-IP assay to show  
763 the interaction between V1 and V2 or V2<sup>C84AC86A</sup>. The Co-IP assay was performed as  
764 in Fig 2a.

765

766 **Fig 5** Characterization of the V2<sup>C85A</sup> mutant. (a) Subcellular localization of V2 and  
767 V2<sup>C85A</sup>. DAPI stains DNA in the nucleus. Bars: 50  $\mu$ m. (b) Quantification of  
768 perinuclear distribution of V2 and V2<sup>C85A</sup>. The number of cells with perinuclear  
769 distribution in different samples as in a. Experiments were repeated three times and 30  
770 cells were observed in each trepeat. Values represent percentages of cells with a  
771 perinuclear distribution of YFP signal  $\pm$  SD (standard deviation). Data were analyzed  
772 using Student's t-test and asterisks denote significant differences between V2-YFP-  
773 and V2<sup>C85A</sup>-YFP-infiltrated leaves (\*P < 0.05). (c) Western blot analysis showing  
774 accumulated V2 and V2<sup>C85A</sup> using anti-GFP polyclonal antibody. Actin serves as a  
775 control for equal loading. (d) The localization of V1-YFP expressed alone or  
776 co-expressed with V2<sup>C85A</sup> in *N. benthamiana* leaves. Bars: 20  $\mu$ m. (e) Comparison of  
777 the nucleus-localized V1-YFP in the absence or presence of V2<sup>C85A</sup>. At least 150 cells  
778 were analyzed from three independent repeats (at least 50 cells from each experiment.  
779 Values represent mean  $\pm$  SD relative to plants infiltrated with V1-YFP in the absence

780 or presence of V2<sup>C85A</sup>. The data were analyzed using Student's t-test and no  
781 significant difference was found for V1-YFP distribution between V1-YFP and  
782 V1-YFP+ FLAG- V2<sup>C85A</sup>. (f) The accumulated V1-YFP and FLAG- V2<sup>C85A</sup> as shown  
783 by Western blot analysis.

784

785 **Fig 6** Effects of the C85S mutation on viral infection and viral accumulation in  
786 TYLCV-inoculated tomato plants. (a) Symptoms in plants that were agro-inoculated  
787 with wt TYLCV or TYLCV-C85S at 16 dpai. CK represents mock-inoculated plants.  
788 Arrows point to the yellowing and curly leaves. (b) The infection time course of wt  
789 TYLCV or TYLCV-C85S infection. Values represent percentages of systemically  
790 infected plants at different DPAI and are given as mean  $\pm$  SD of triplicate experiments.  
791 In each experiment, 15 plants were inoculated and three independent repeats were  
792 performed to confirm the results. (c) Viral DNA levels in plants as measured by  
793 RT-PCR. Plants were inoculated with a wt TYLCV infectious clone or the  
794 TYLCV-C85S, or mock-inoculated (CK). Accumulated levels of *V1* (*CP*) were tested  
795 at 3, 13, 23, and 33 dpai. Tomato leaves were agroinfiltrated with CK, TYLCV, or  
796 TYLCV-C85S. Total RNAs were extracted from newly emerged leaves. Values  
797 represent the mean relative to the CK-treated plants (n=3 biological replicates) and  
798 were normalized with *SlActin* as an internal reference. (d) Western blot analyses of  
799 accumulated V1 (*CP*), which represents viral particles, in CK, TYLCV and  
800 TYLCV-C85S inoculated plants at 16 dpai.

801

802 **Fig 7** Effects of the C85S mutation on viral infection and viral accumulation in  
803 TYLCV-inoculated *N. benthamiana*. (a) Symptoms in plants that were  
804 agro-inoculated with wt TYLCV or TYLCV-C85S at 16 dpai. CK represents  
805 mock-inoculated plants. Arrows point to the curly leaves. (b) The infection time  
806 course of wt TYLCV or TYLCV-C85S infection. Values represent percentages of  
807 systemically infected plants at different DPAI and are given as the mean  $\pm$  SD of  
808 triplicate experiments. In each experiment, 15 plants were inoculated and three  
809 independent experiments were performed to confirm the results. (c) Viral DNA levels  
810 in plants inoculated with wt TYLCV infectious clone or TYLCV-C85S. Accumulated  
811 levels of *VI (CP)* were tested at 3, 13, 23, and 33 dpai. *N. benthamiana* leaves were  
812 agroinfiltrated with CK, TYLCV, or TYLCV-C85S. Total RNAs was extracted from  
813 newly emerged leaves. Values represent the mean relative to the CK-treated plants  
814 (n=3 biological replicates) and were normalized with *NbActin* as an internal reference.  
815 (d) Western blot analyses of accumulated V1 (CP), which represents viral particles, in  
816 CK, TYLCV and TYLCV-C85S inoculated plants at 16 dpai.

817

818 **Fig 8** A working model proposed for V2-mediated nucleocytoplasmic trafficking of  
819 V1 protein. Viral genomic DNAs are bound by V1 and import into the nucleus with  
820 the help of KAP  $\alpha$ 1 [17,18]. Via the specific interaction between V1 and V2, a

821 V2-V1-ssDNA complex is formed. With the help of exportin- $\alpha$ , V2 facilitates the  
 822 V1-ssDNA complexes to exit the nucleus to the perinucleus and the cytoplasm.

823

824 **Fig 1**

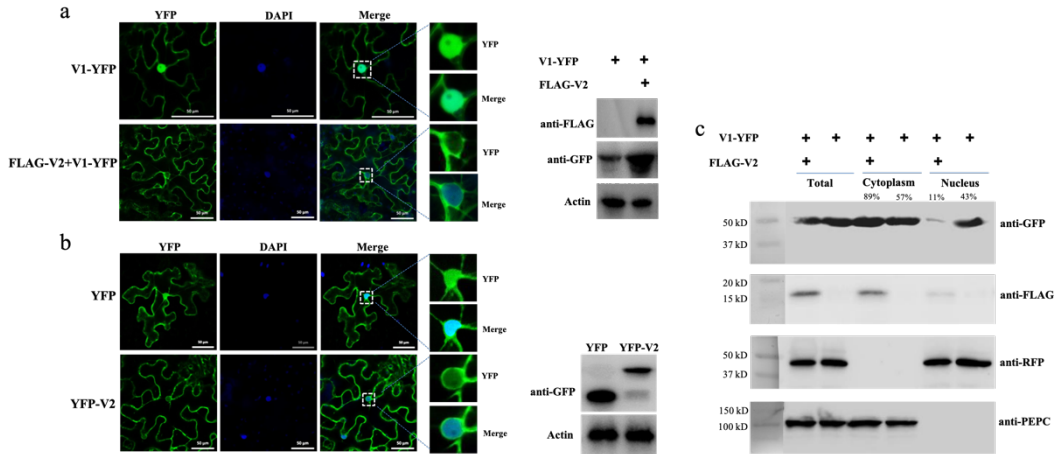

825

826

827 **Fig 2**

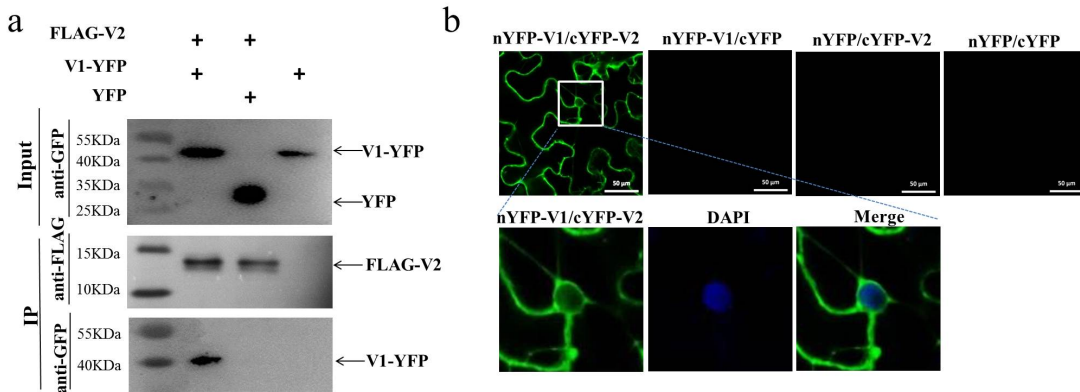

828

829

830

831

832

833 **Fig 3**

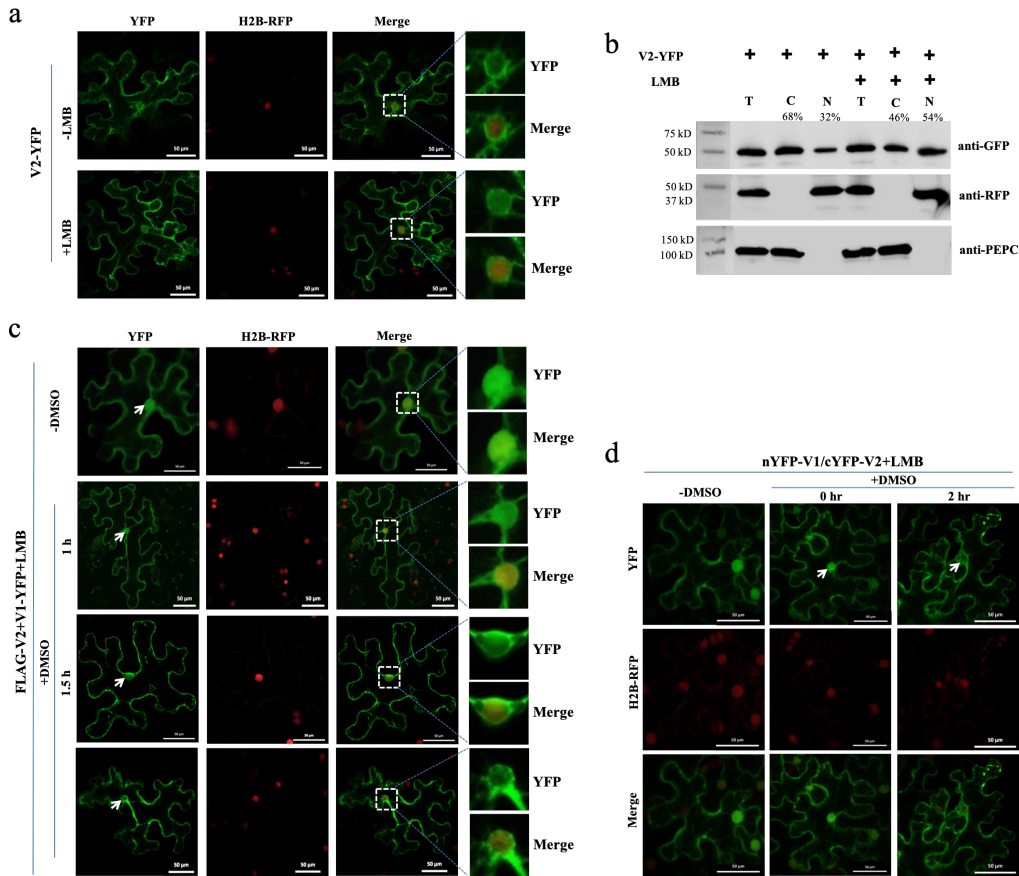

834

835 **Fig 4**

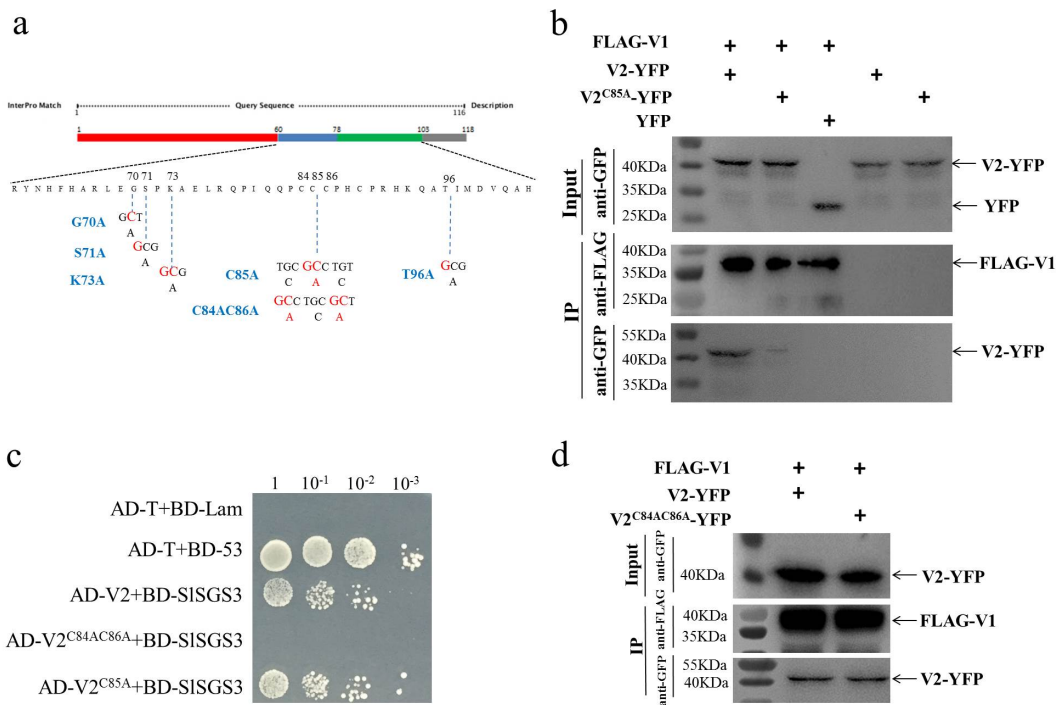

836



837 **Fig 5**

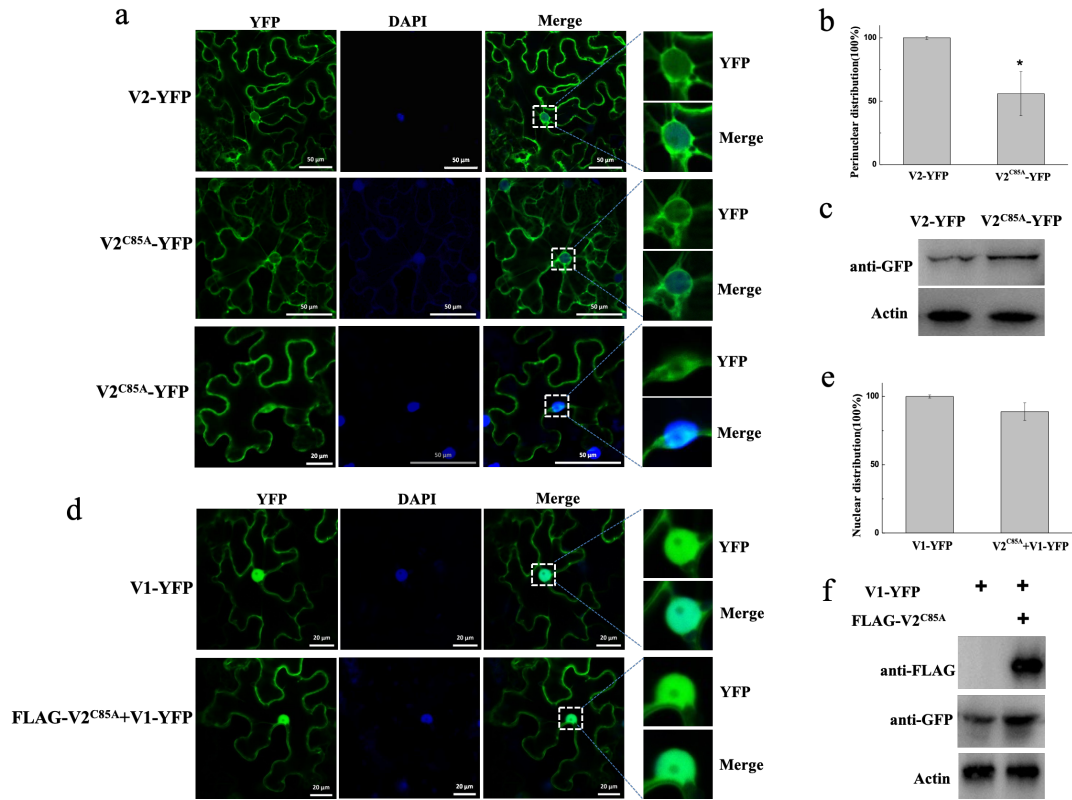

838

839 **Fig 6**

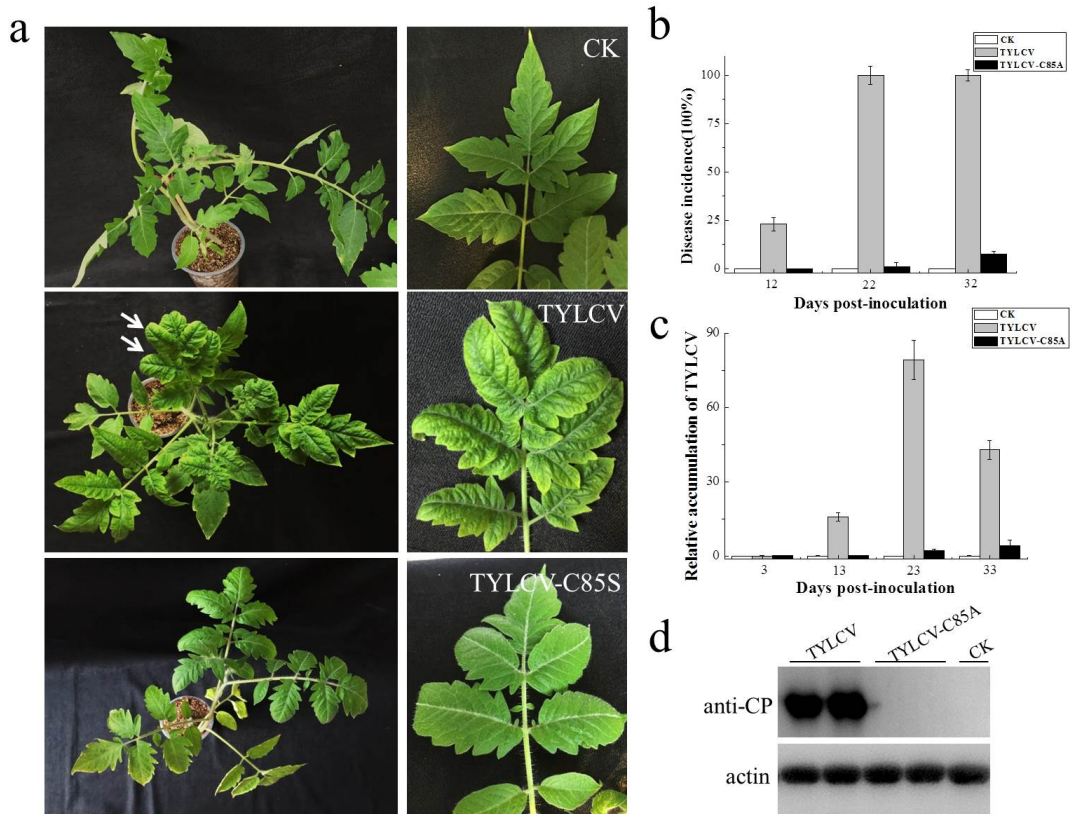

840



841 **Fig 7**

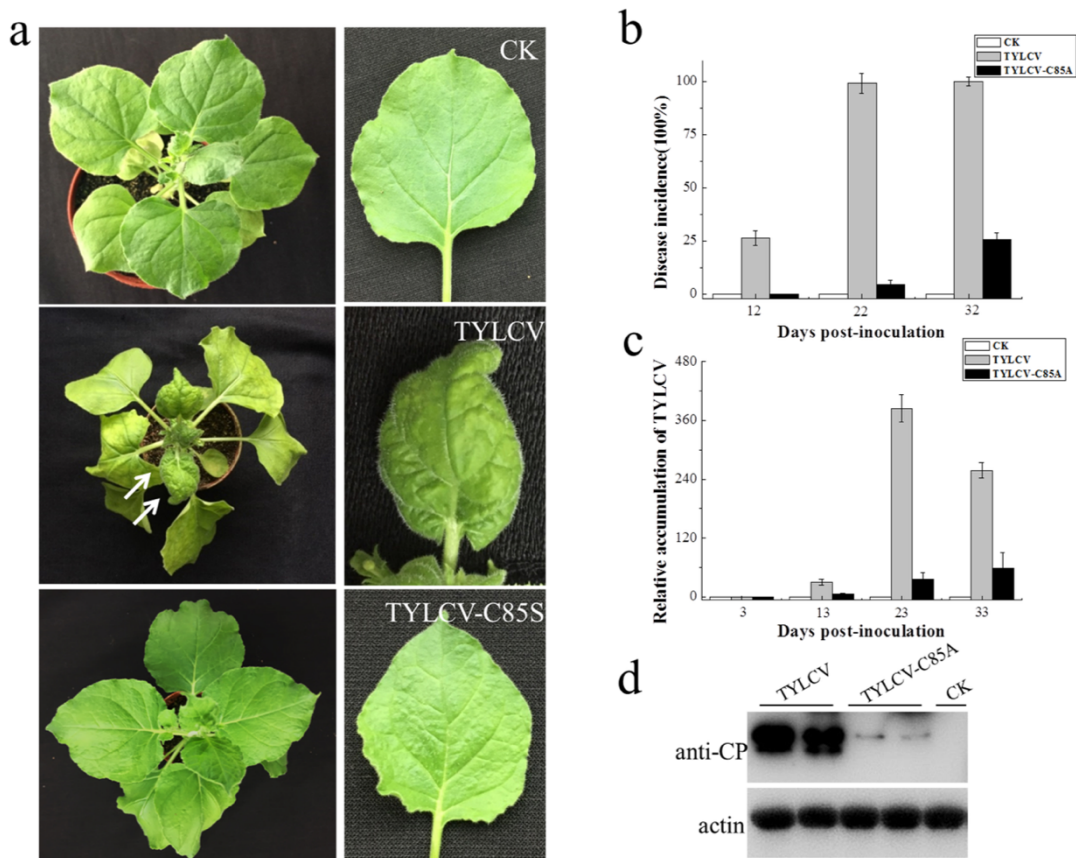

842

843

844 **Fig 8**

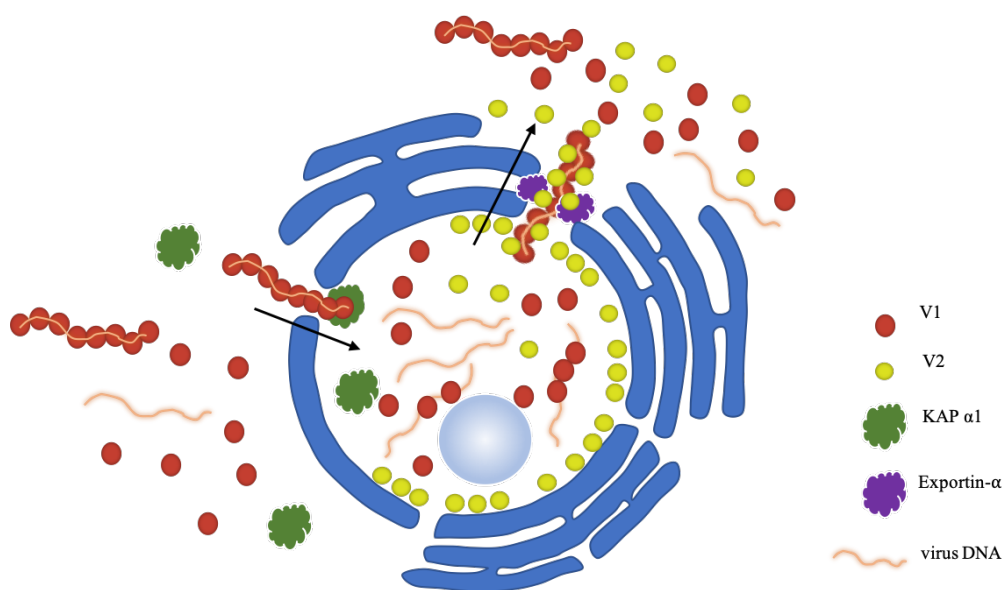

845

846

847 **S1 Fig**

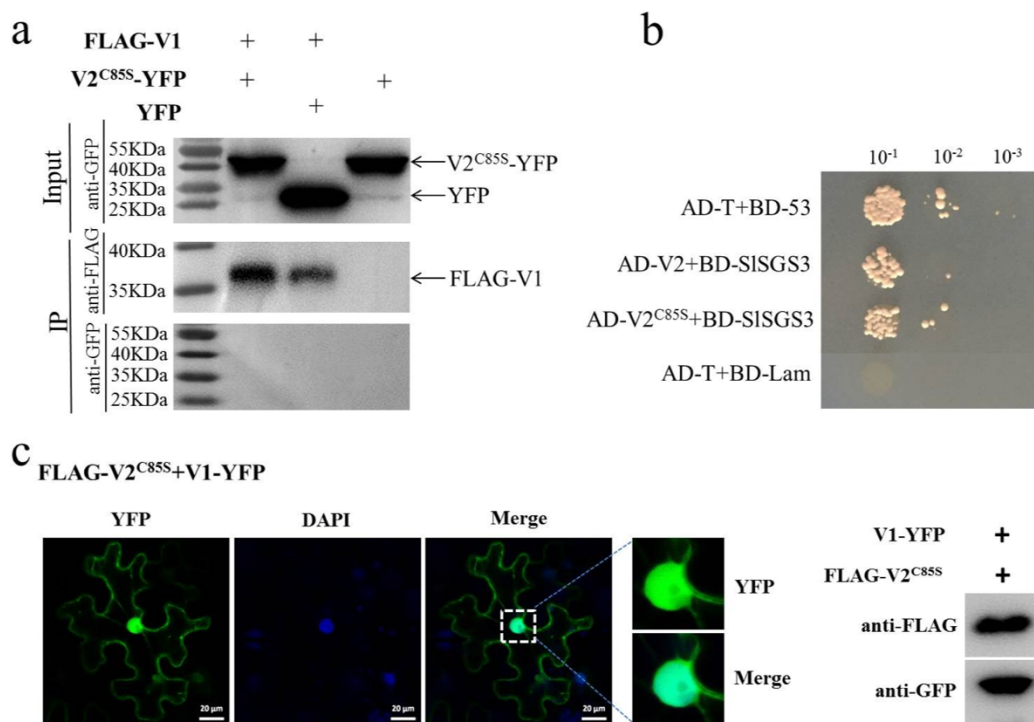

848

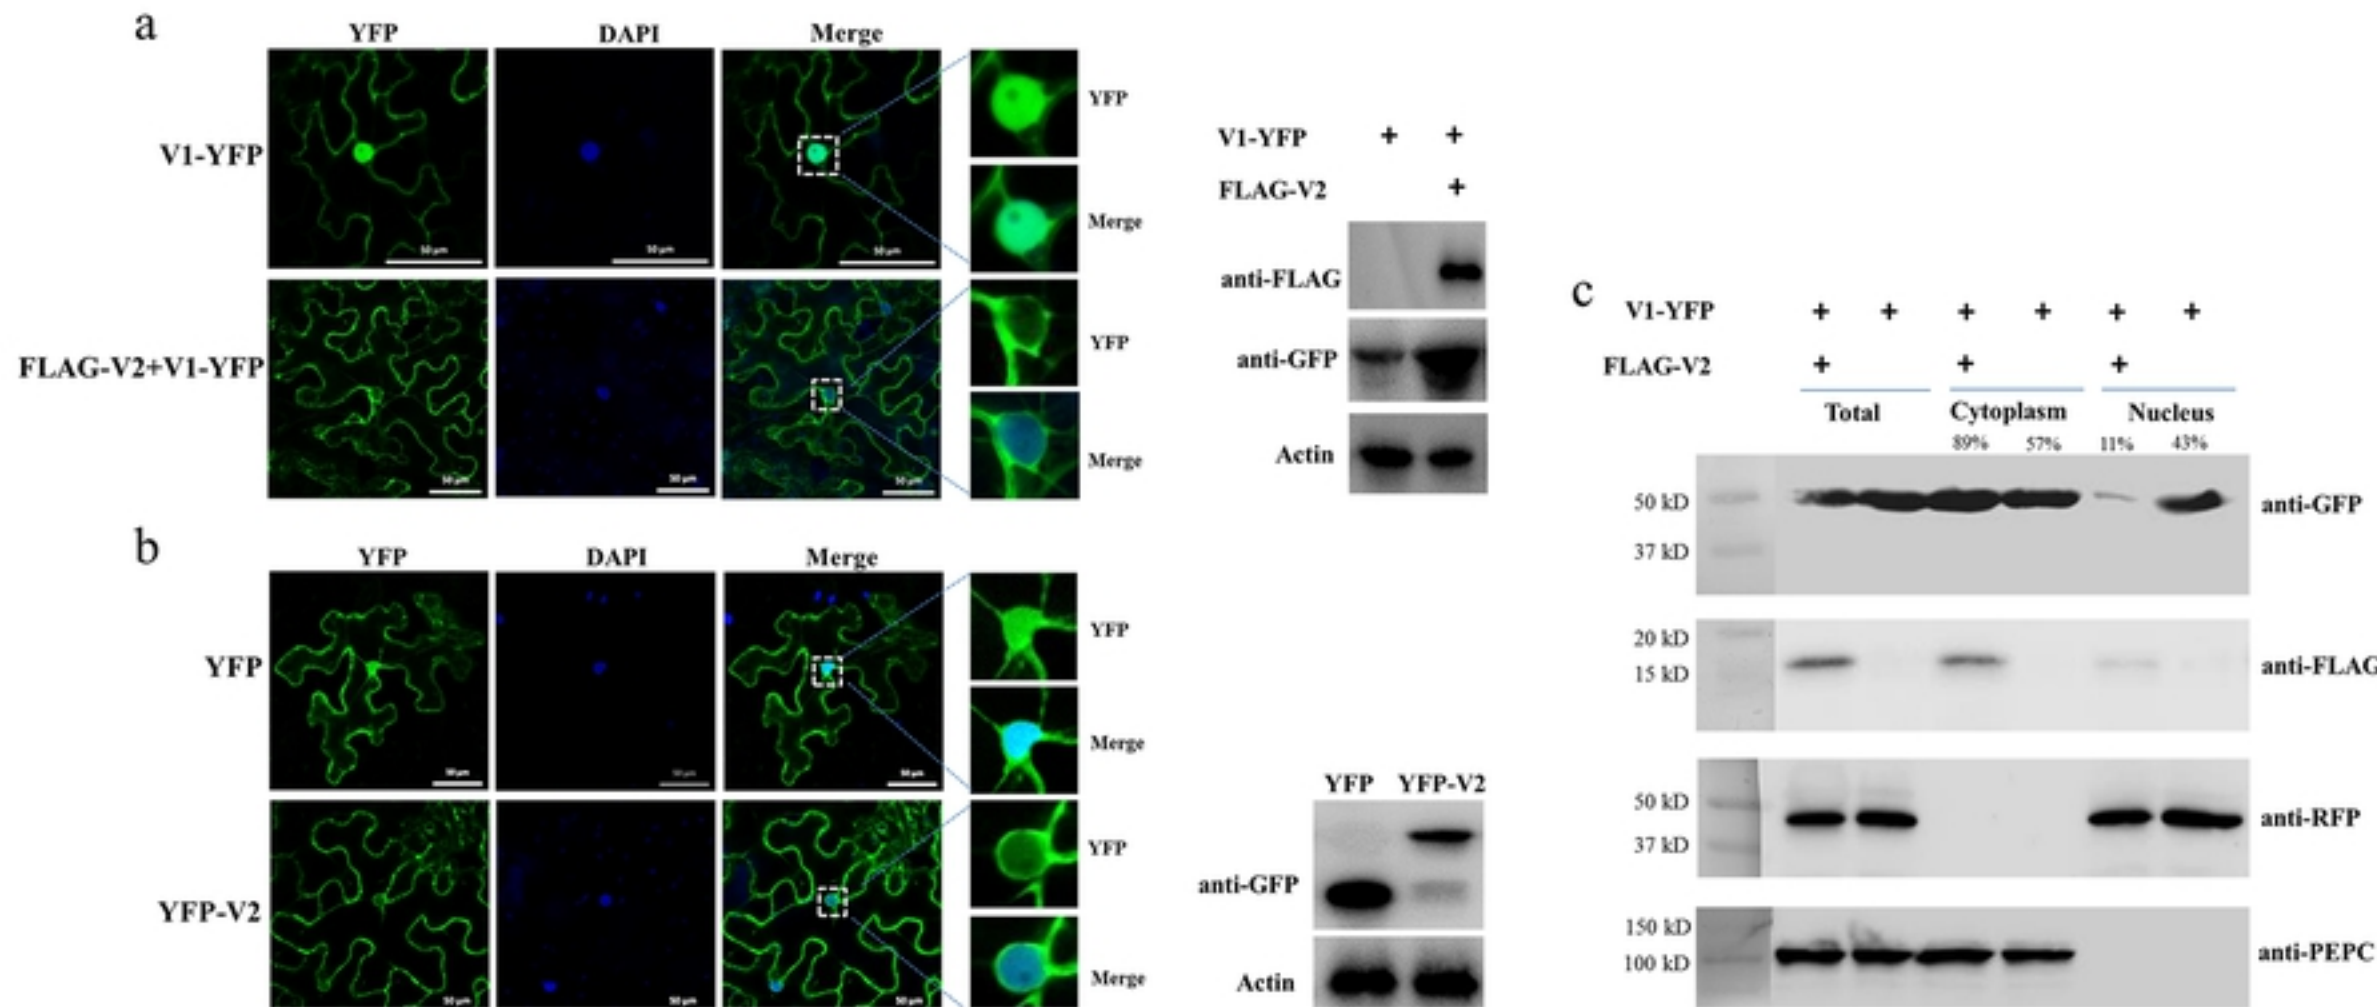

Fig 1

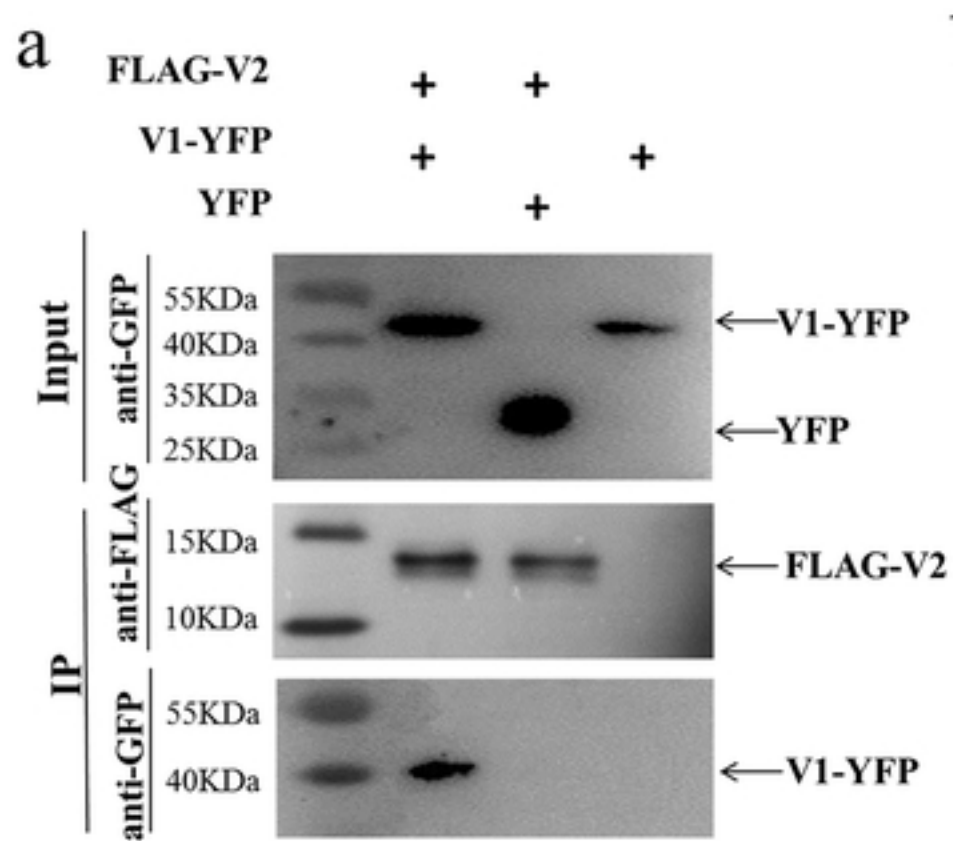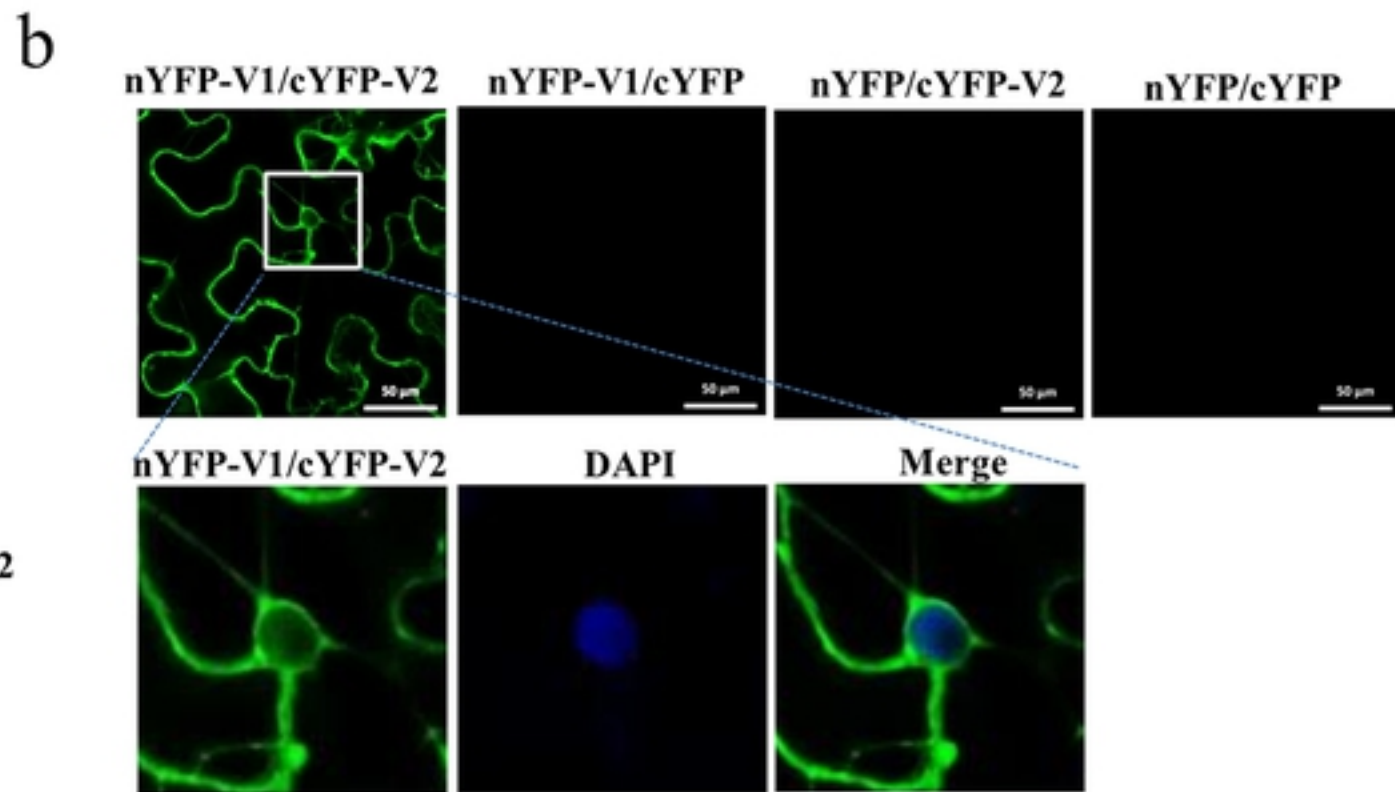

Fig 2

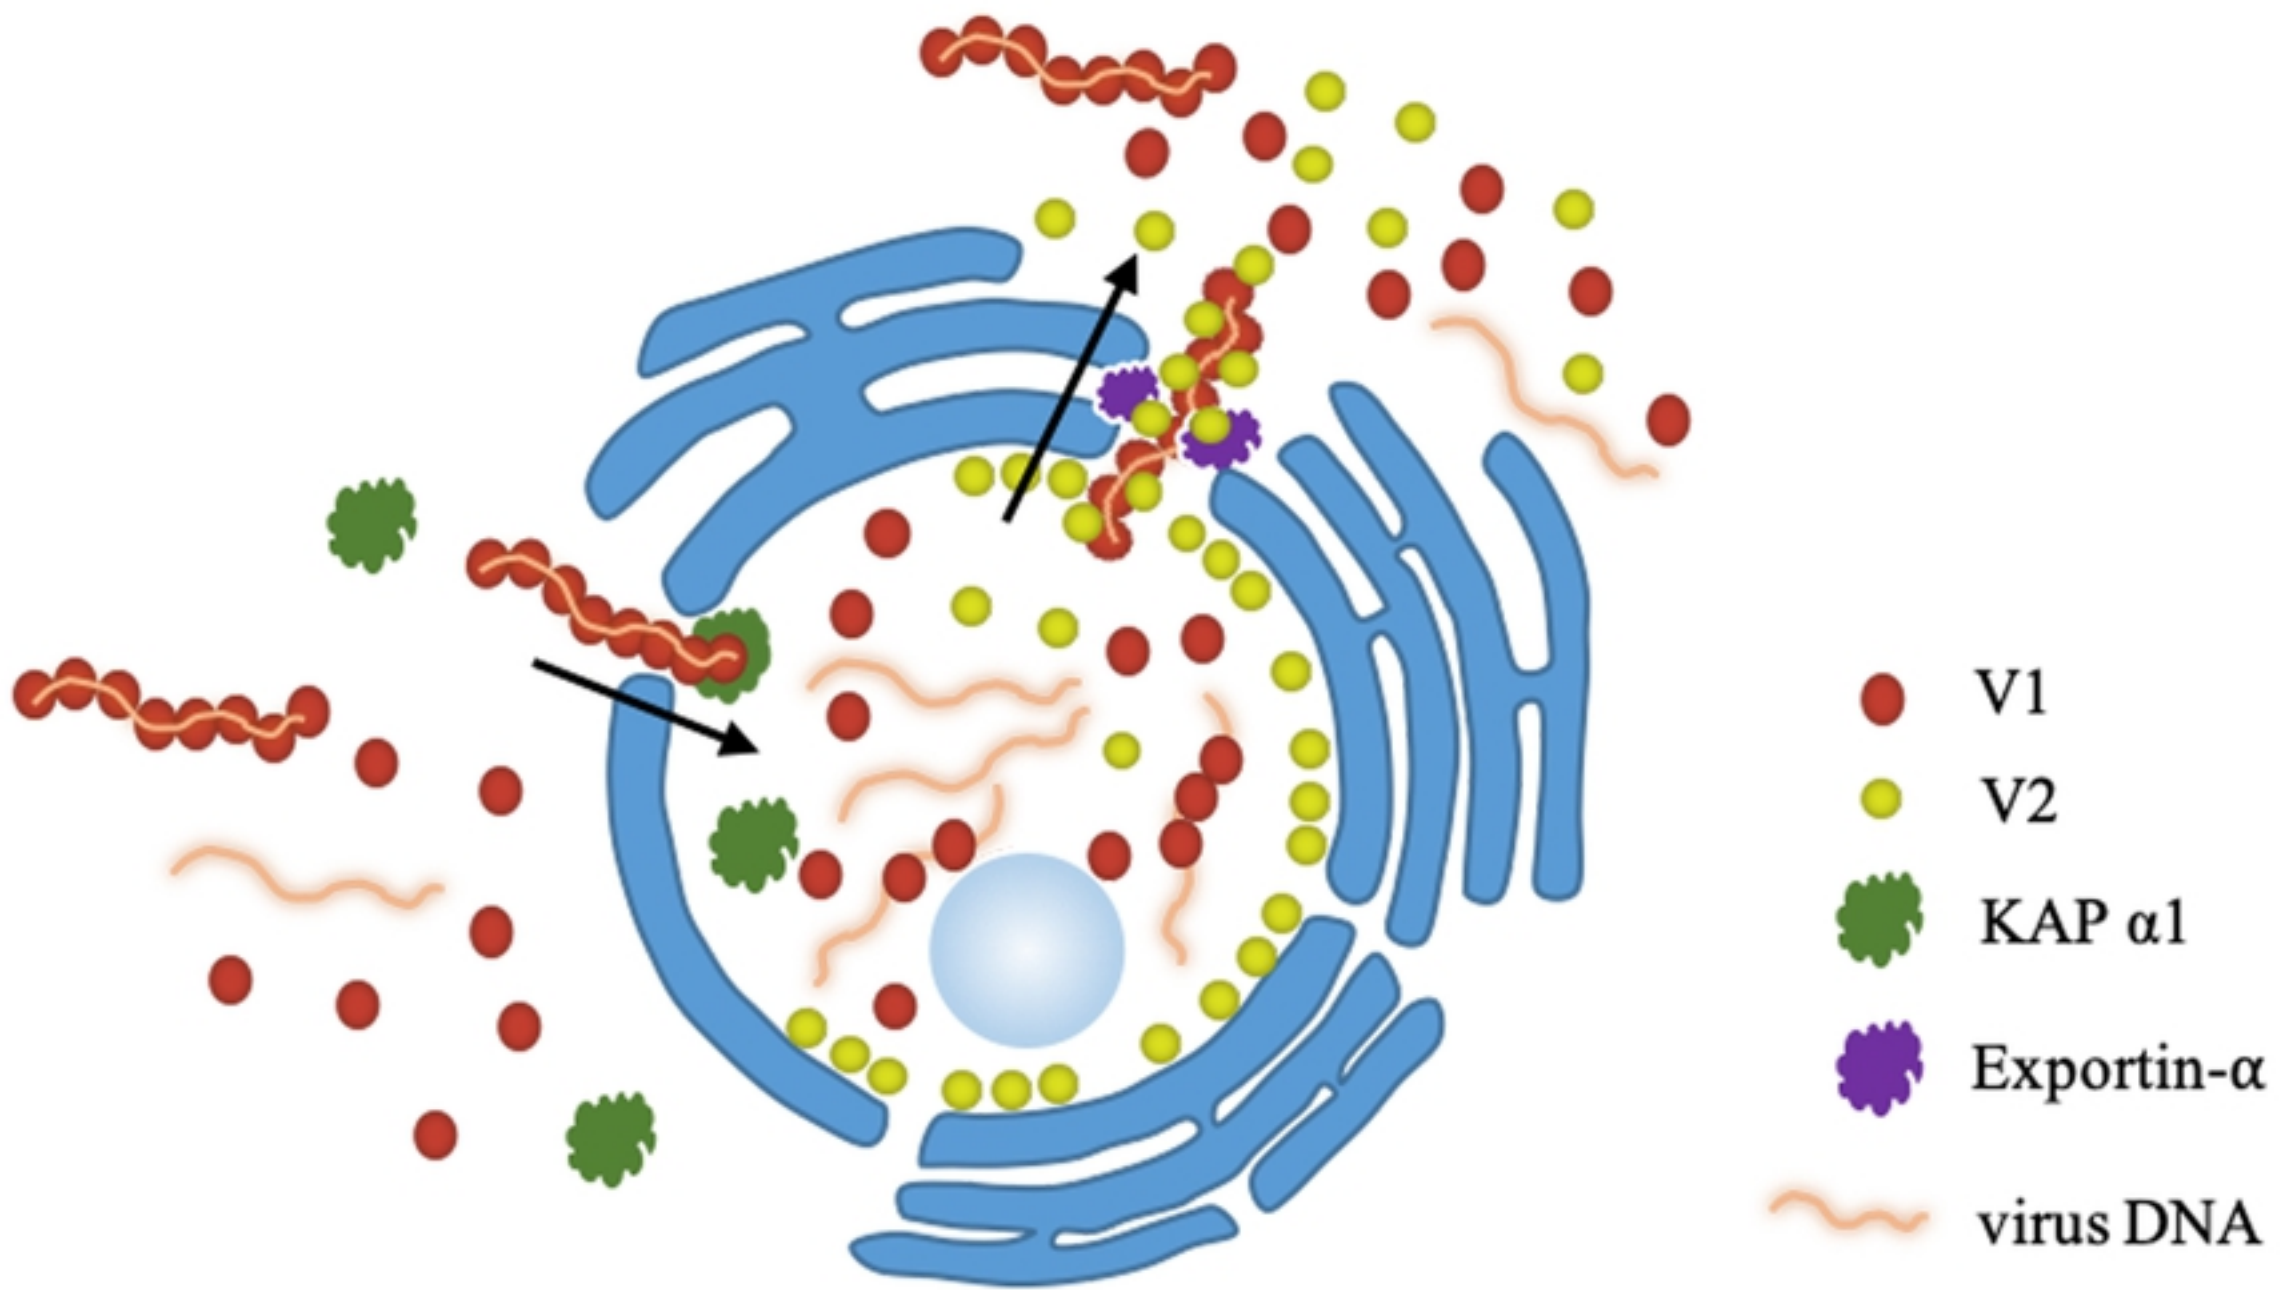

Fig 8



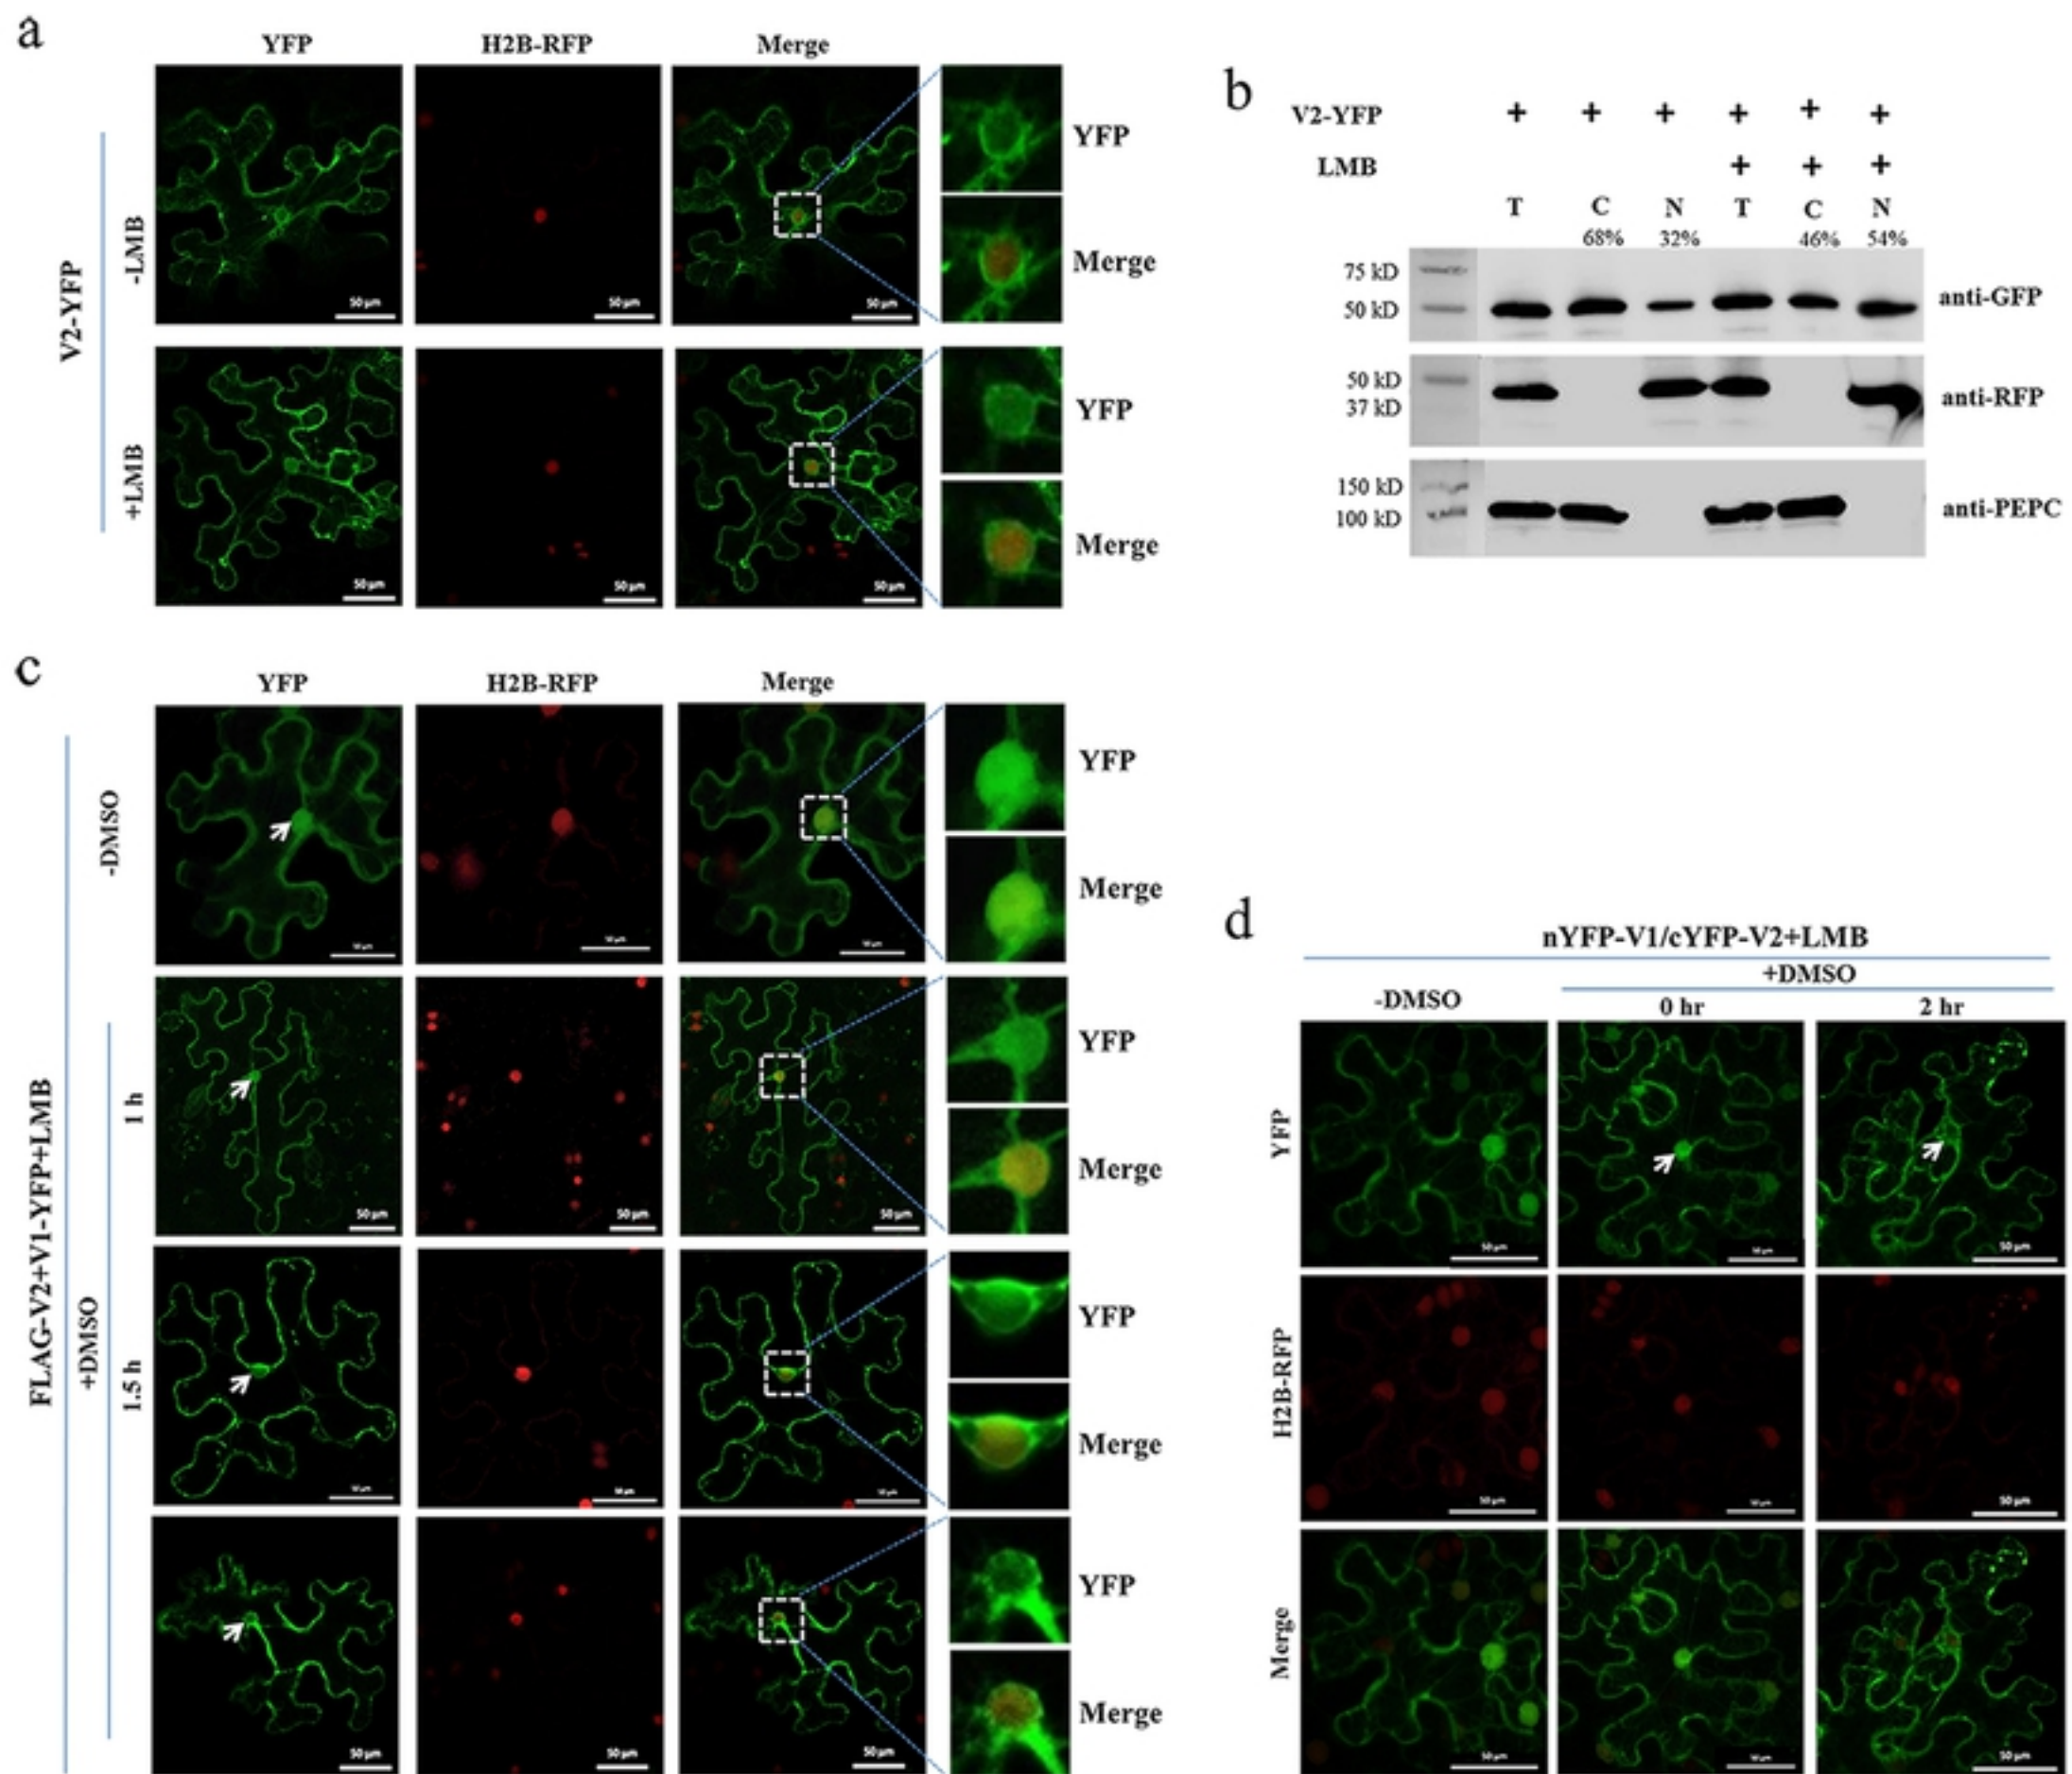

Fig 3

a

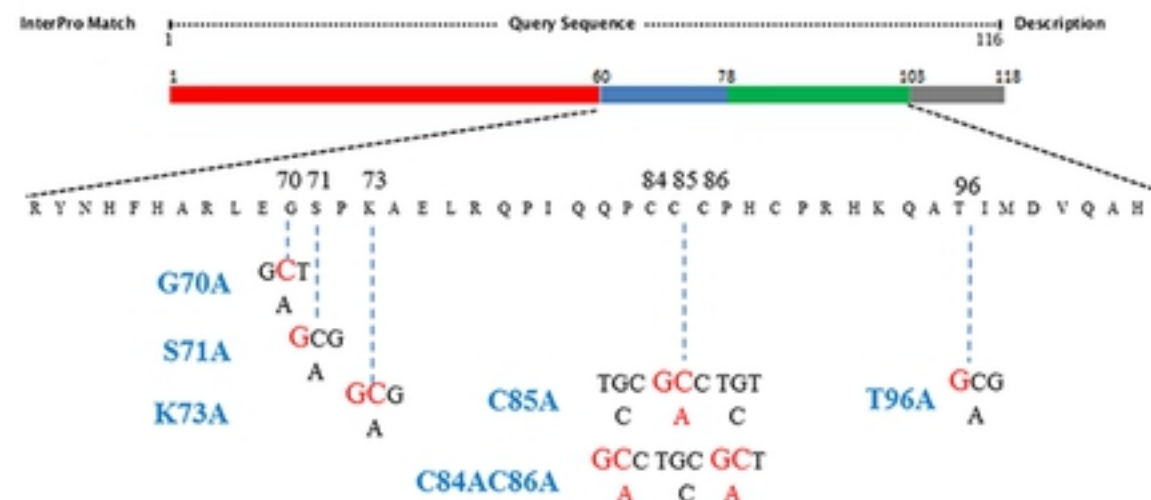

c

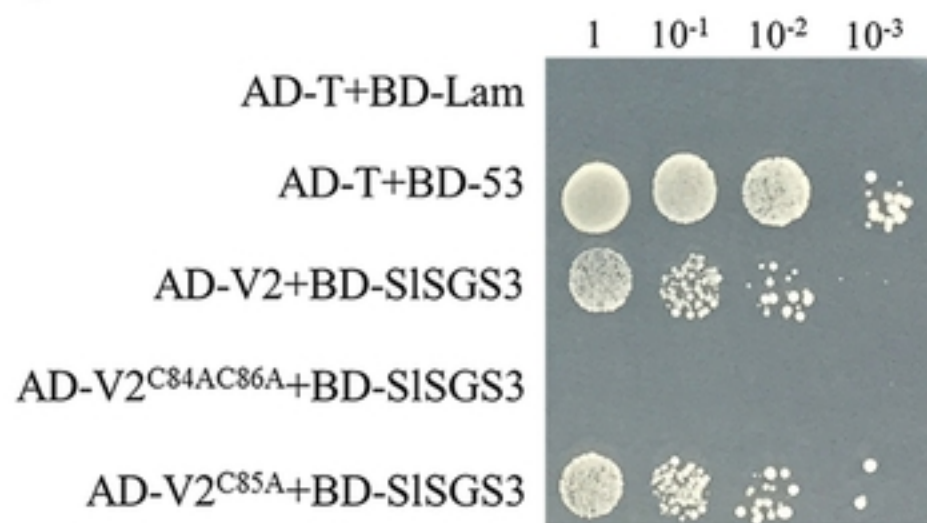

b

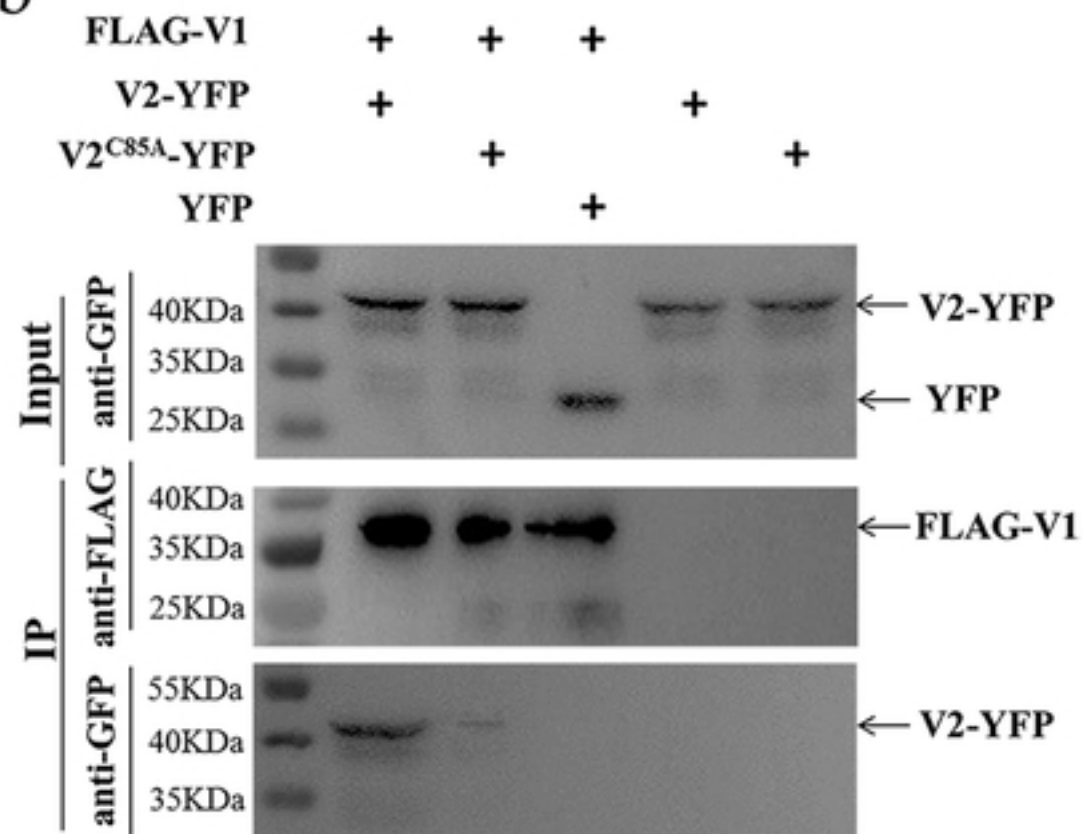

d

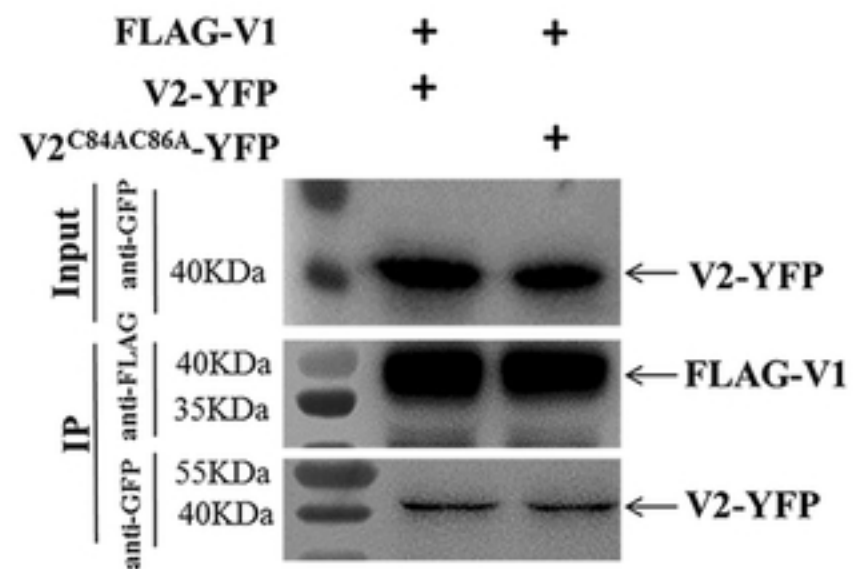

Fig 4



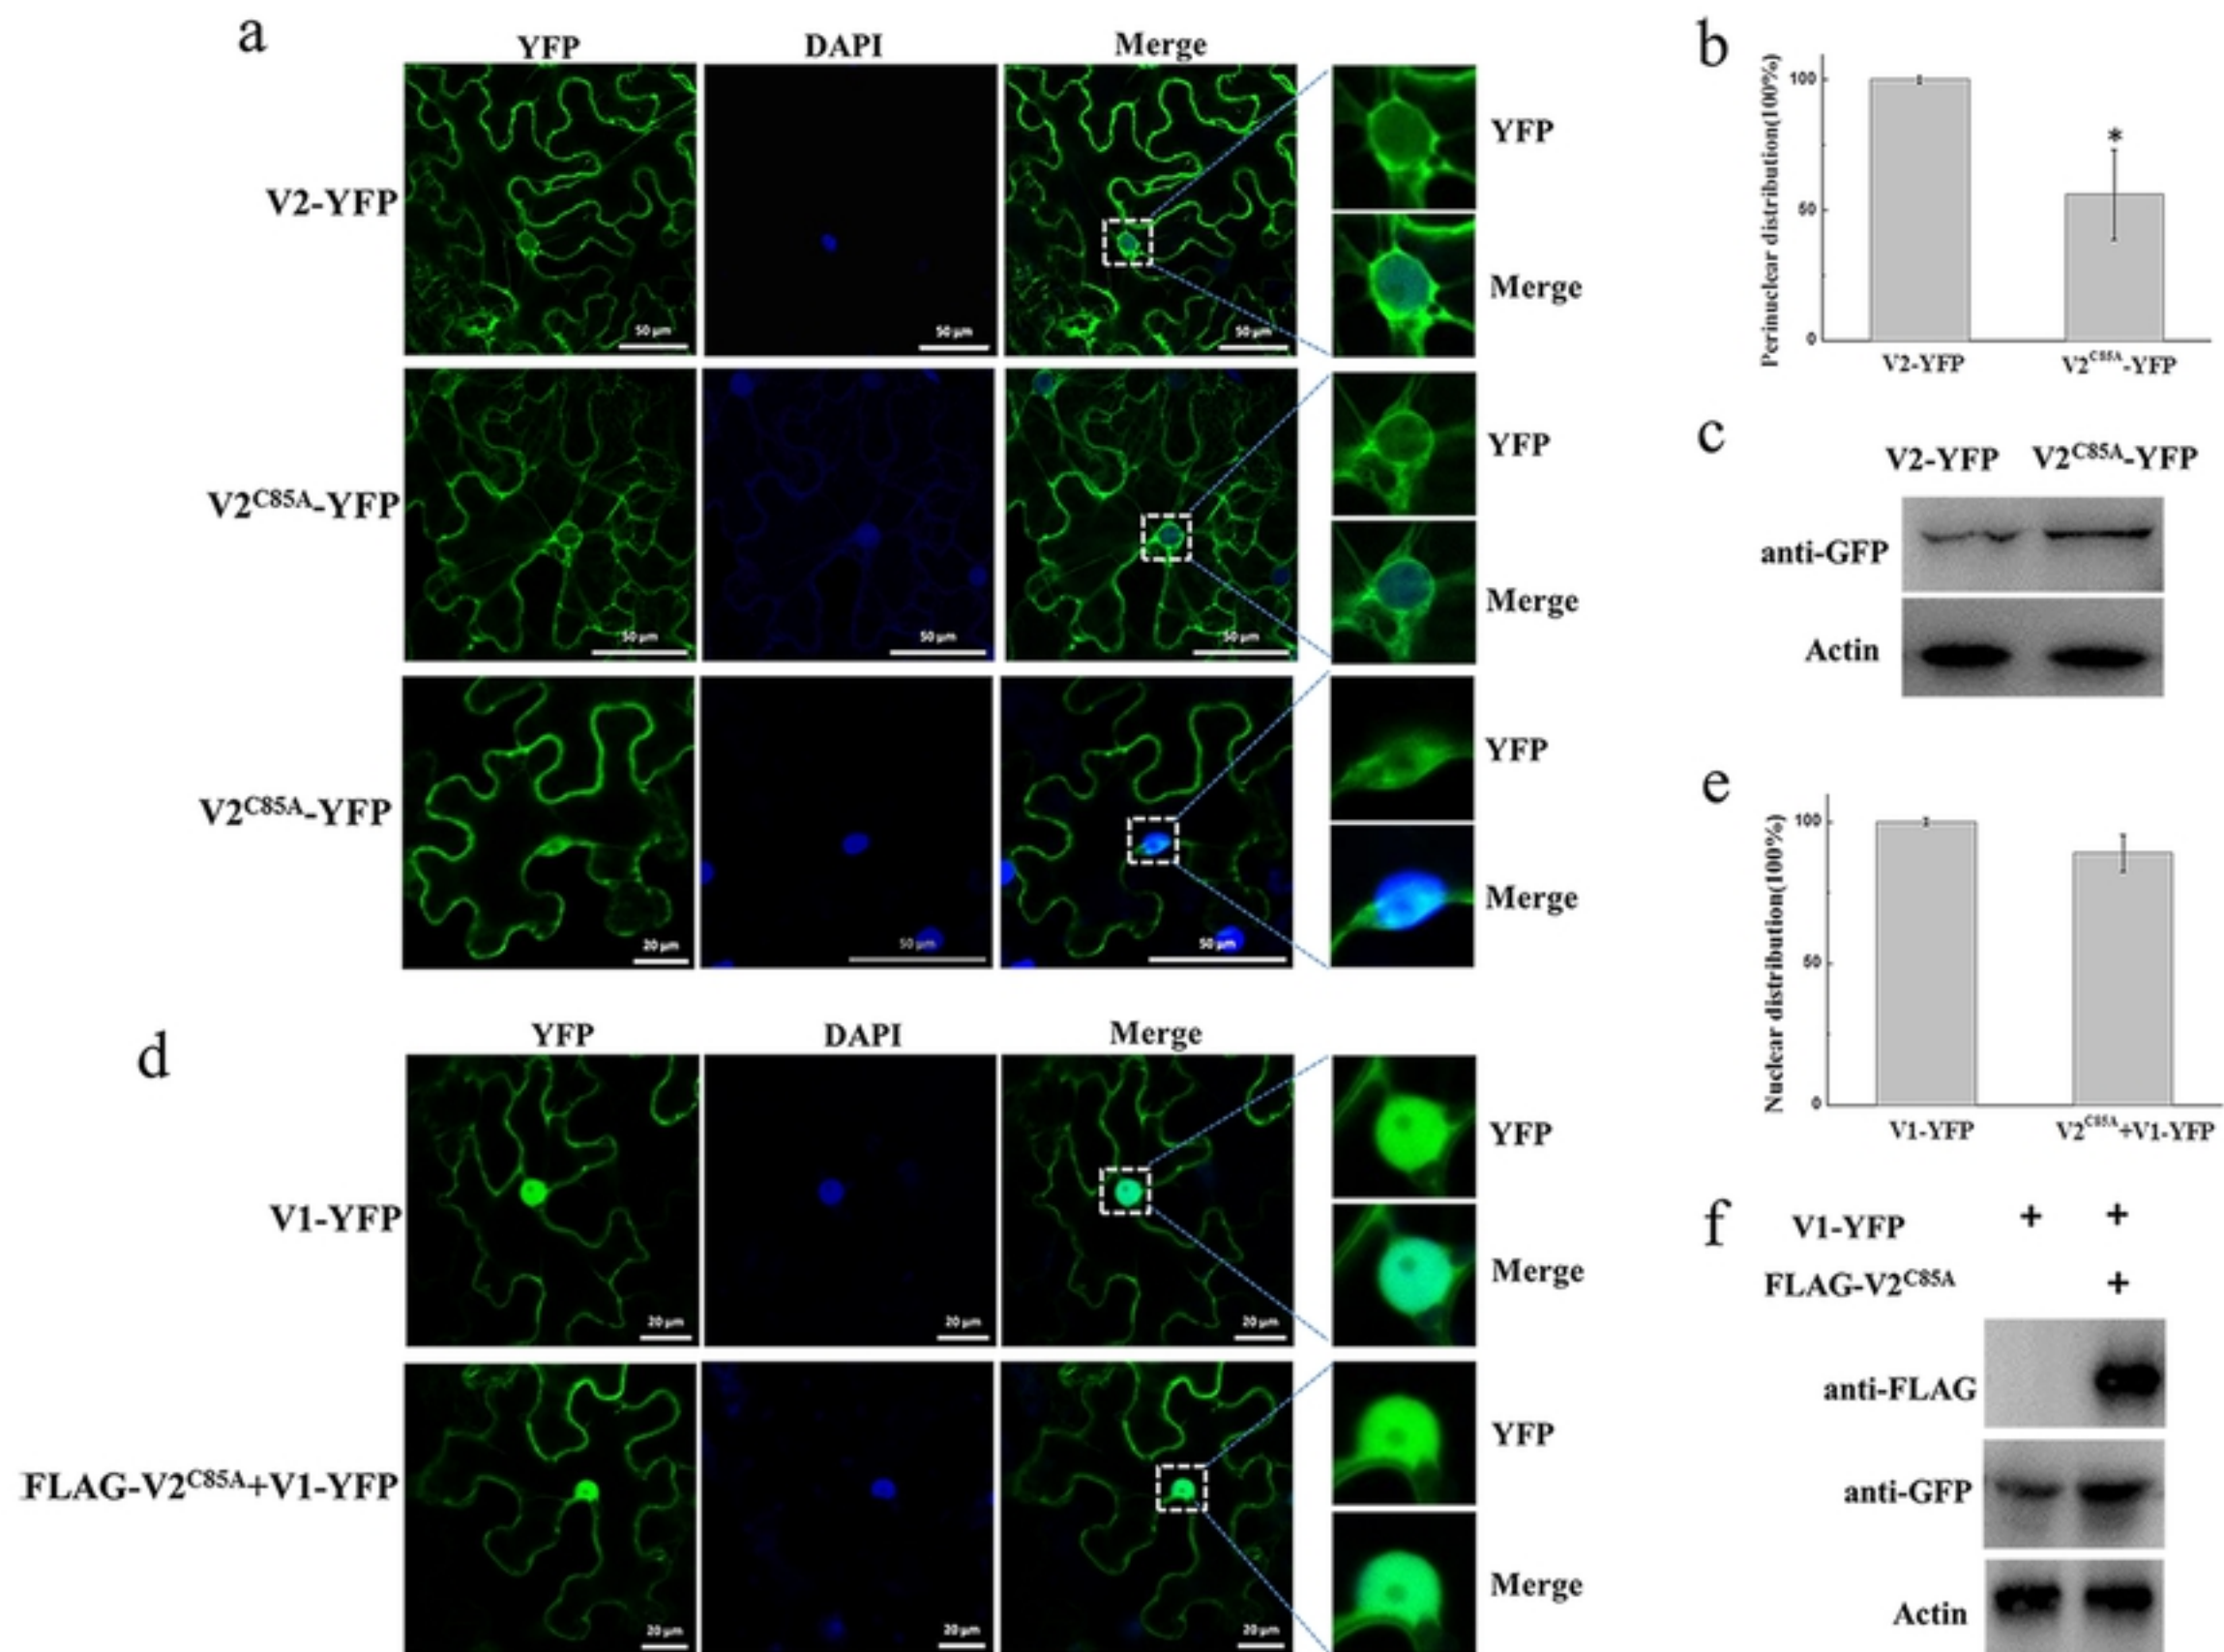

Fig 5



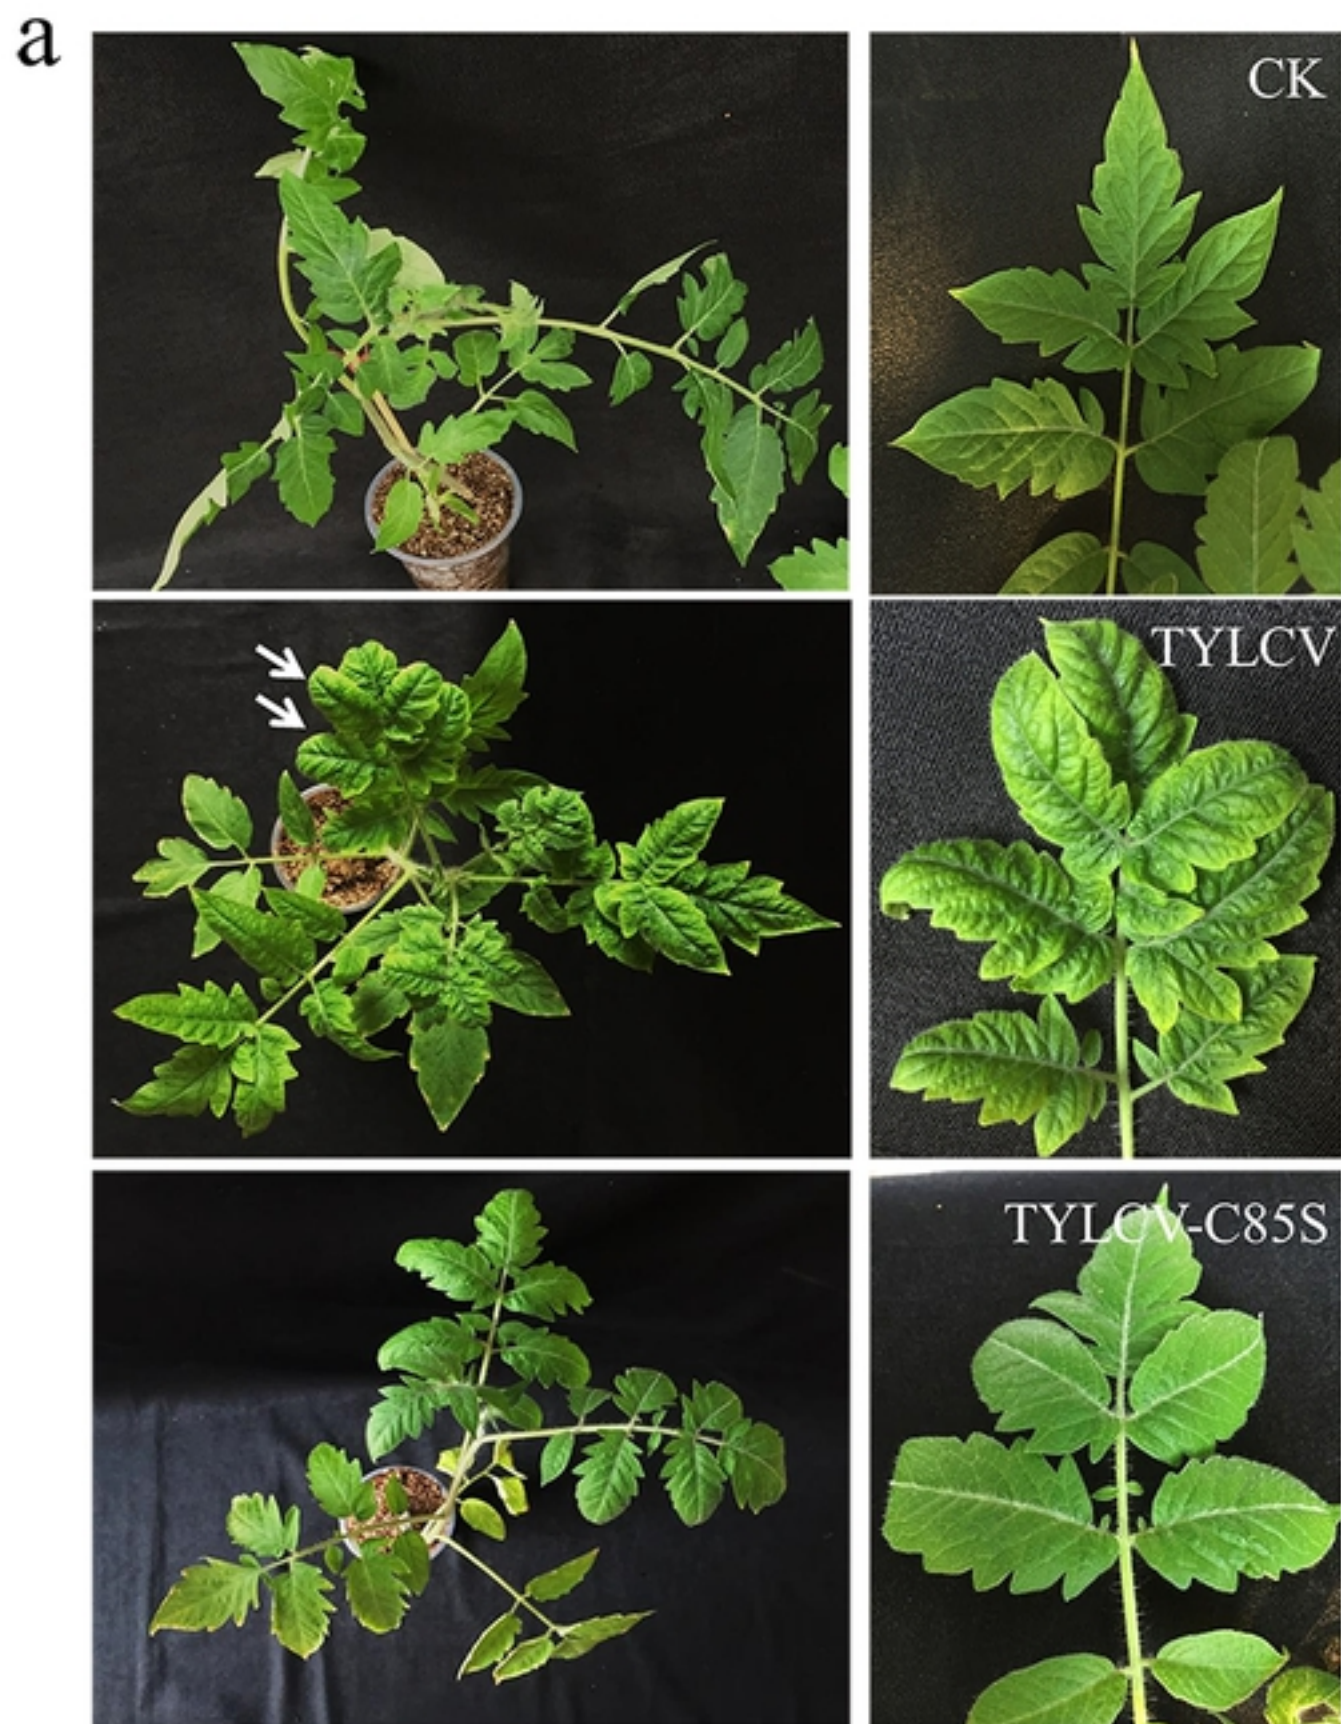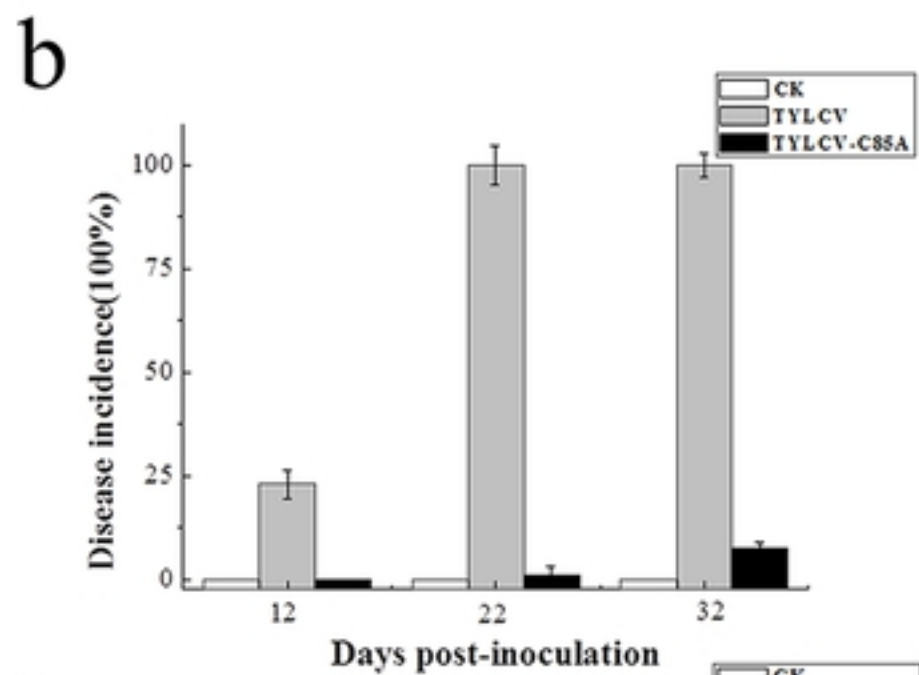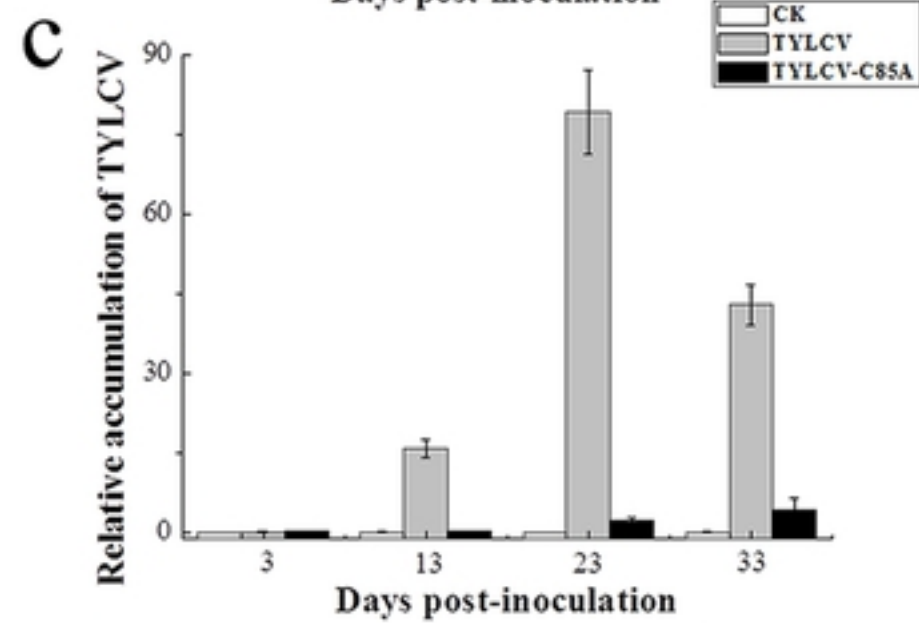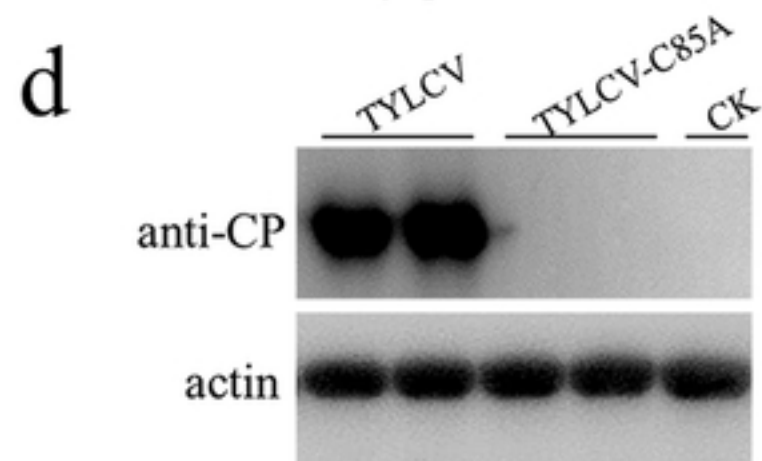

Fig 6



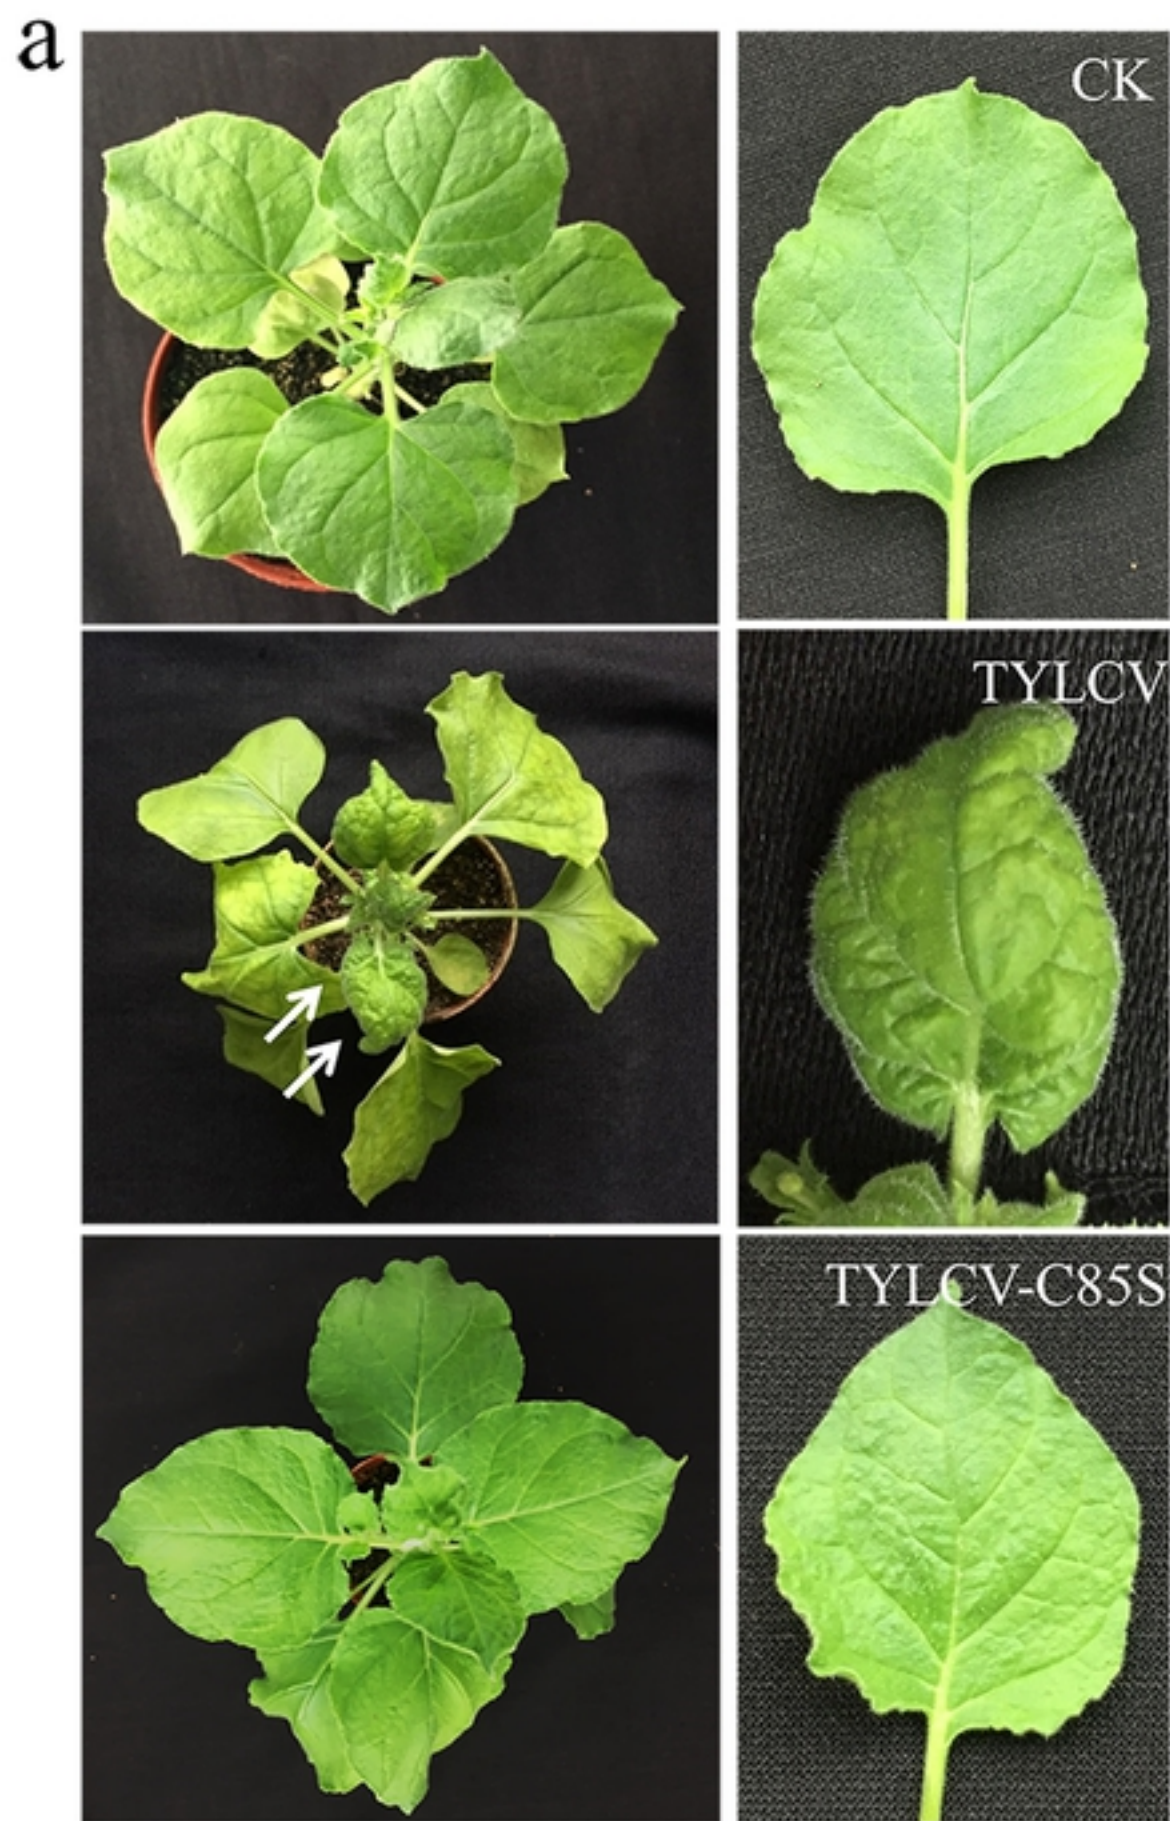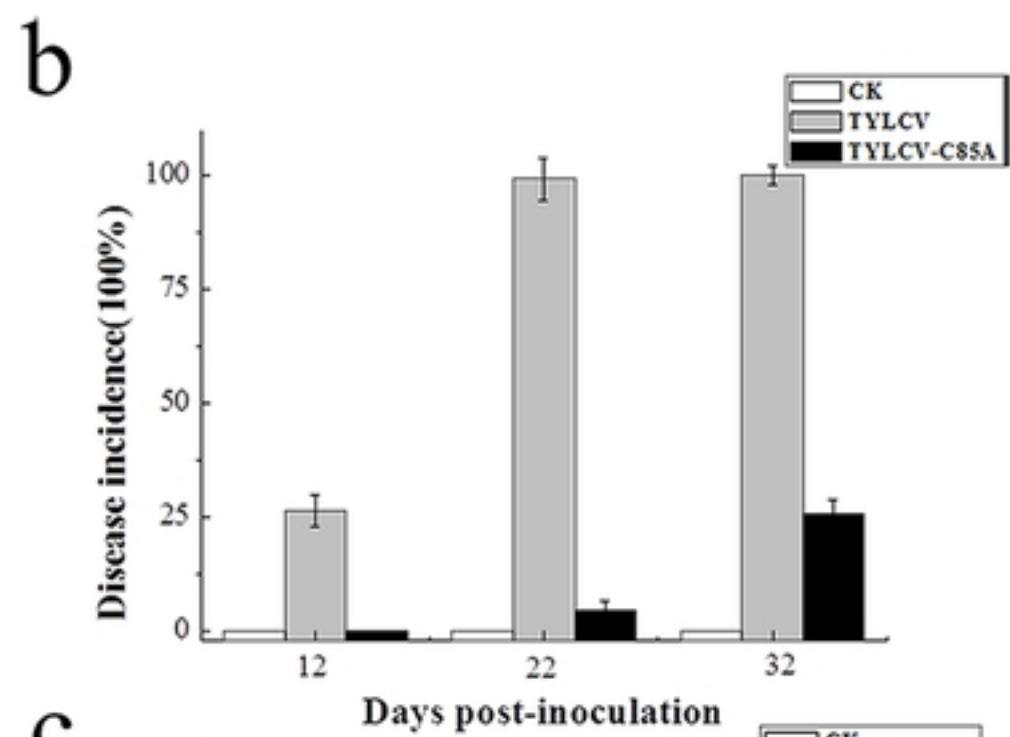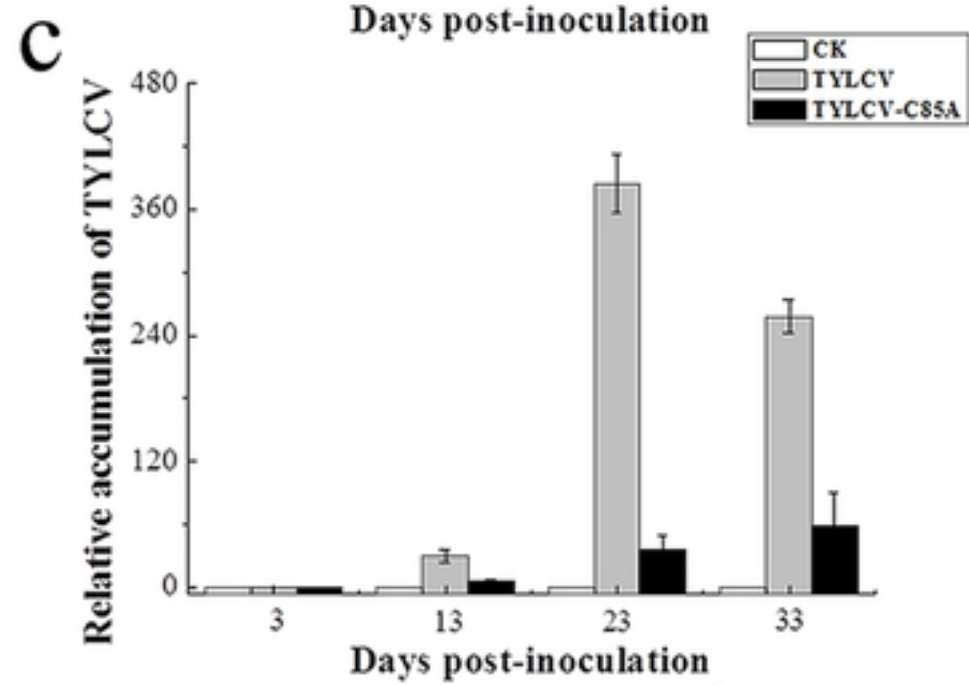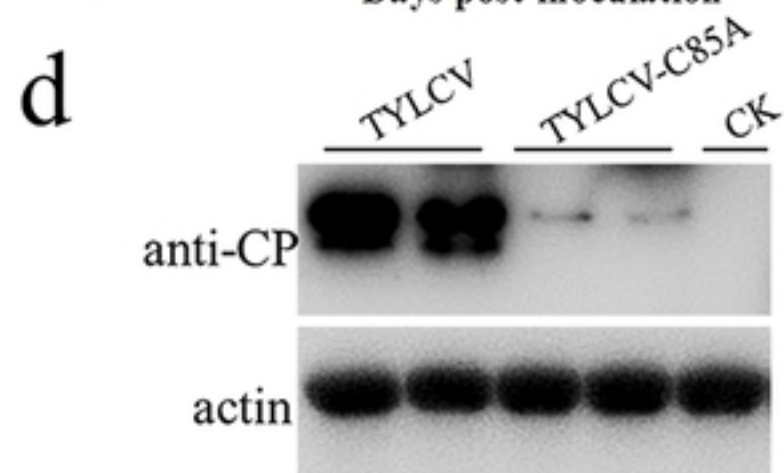

Fig 7

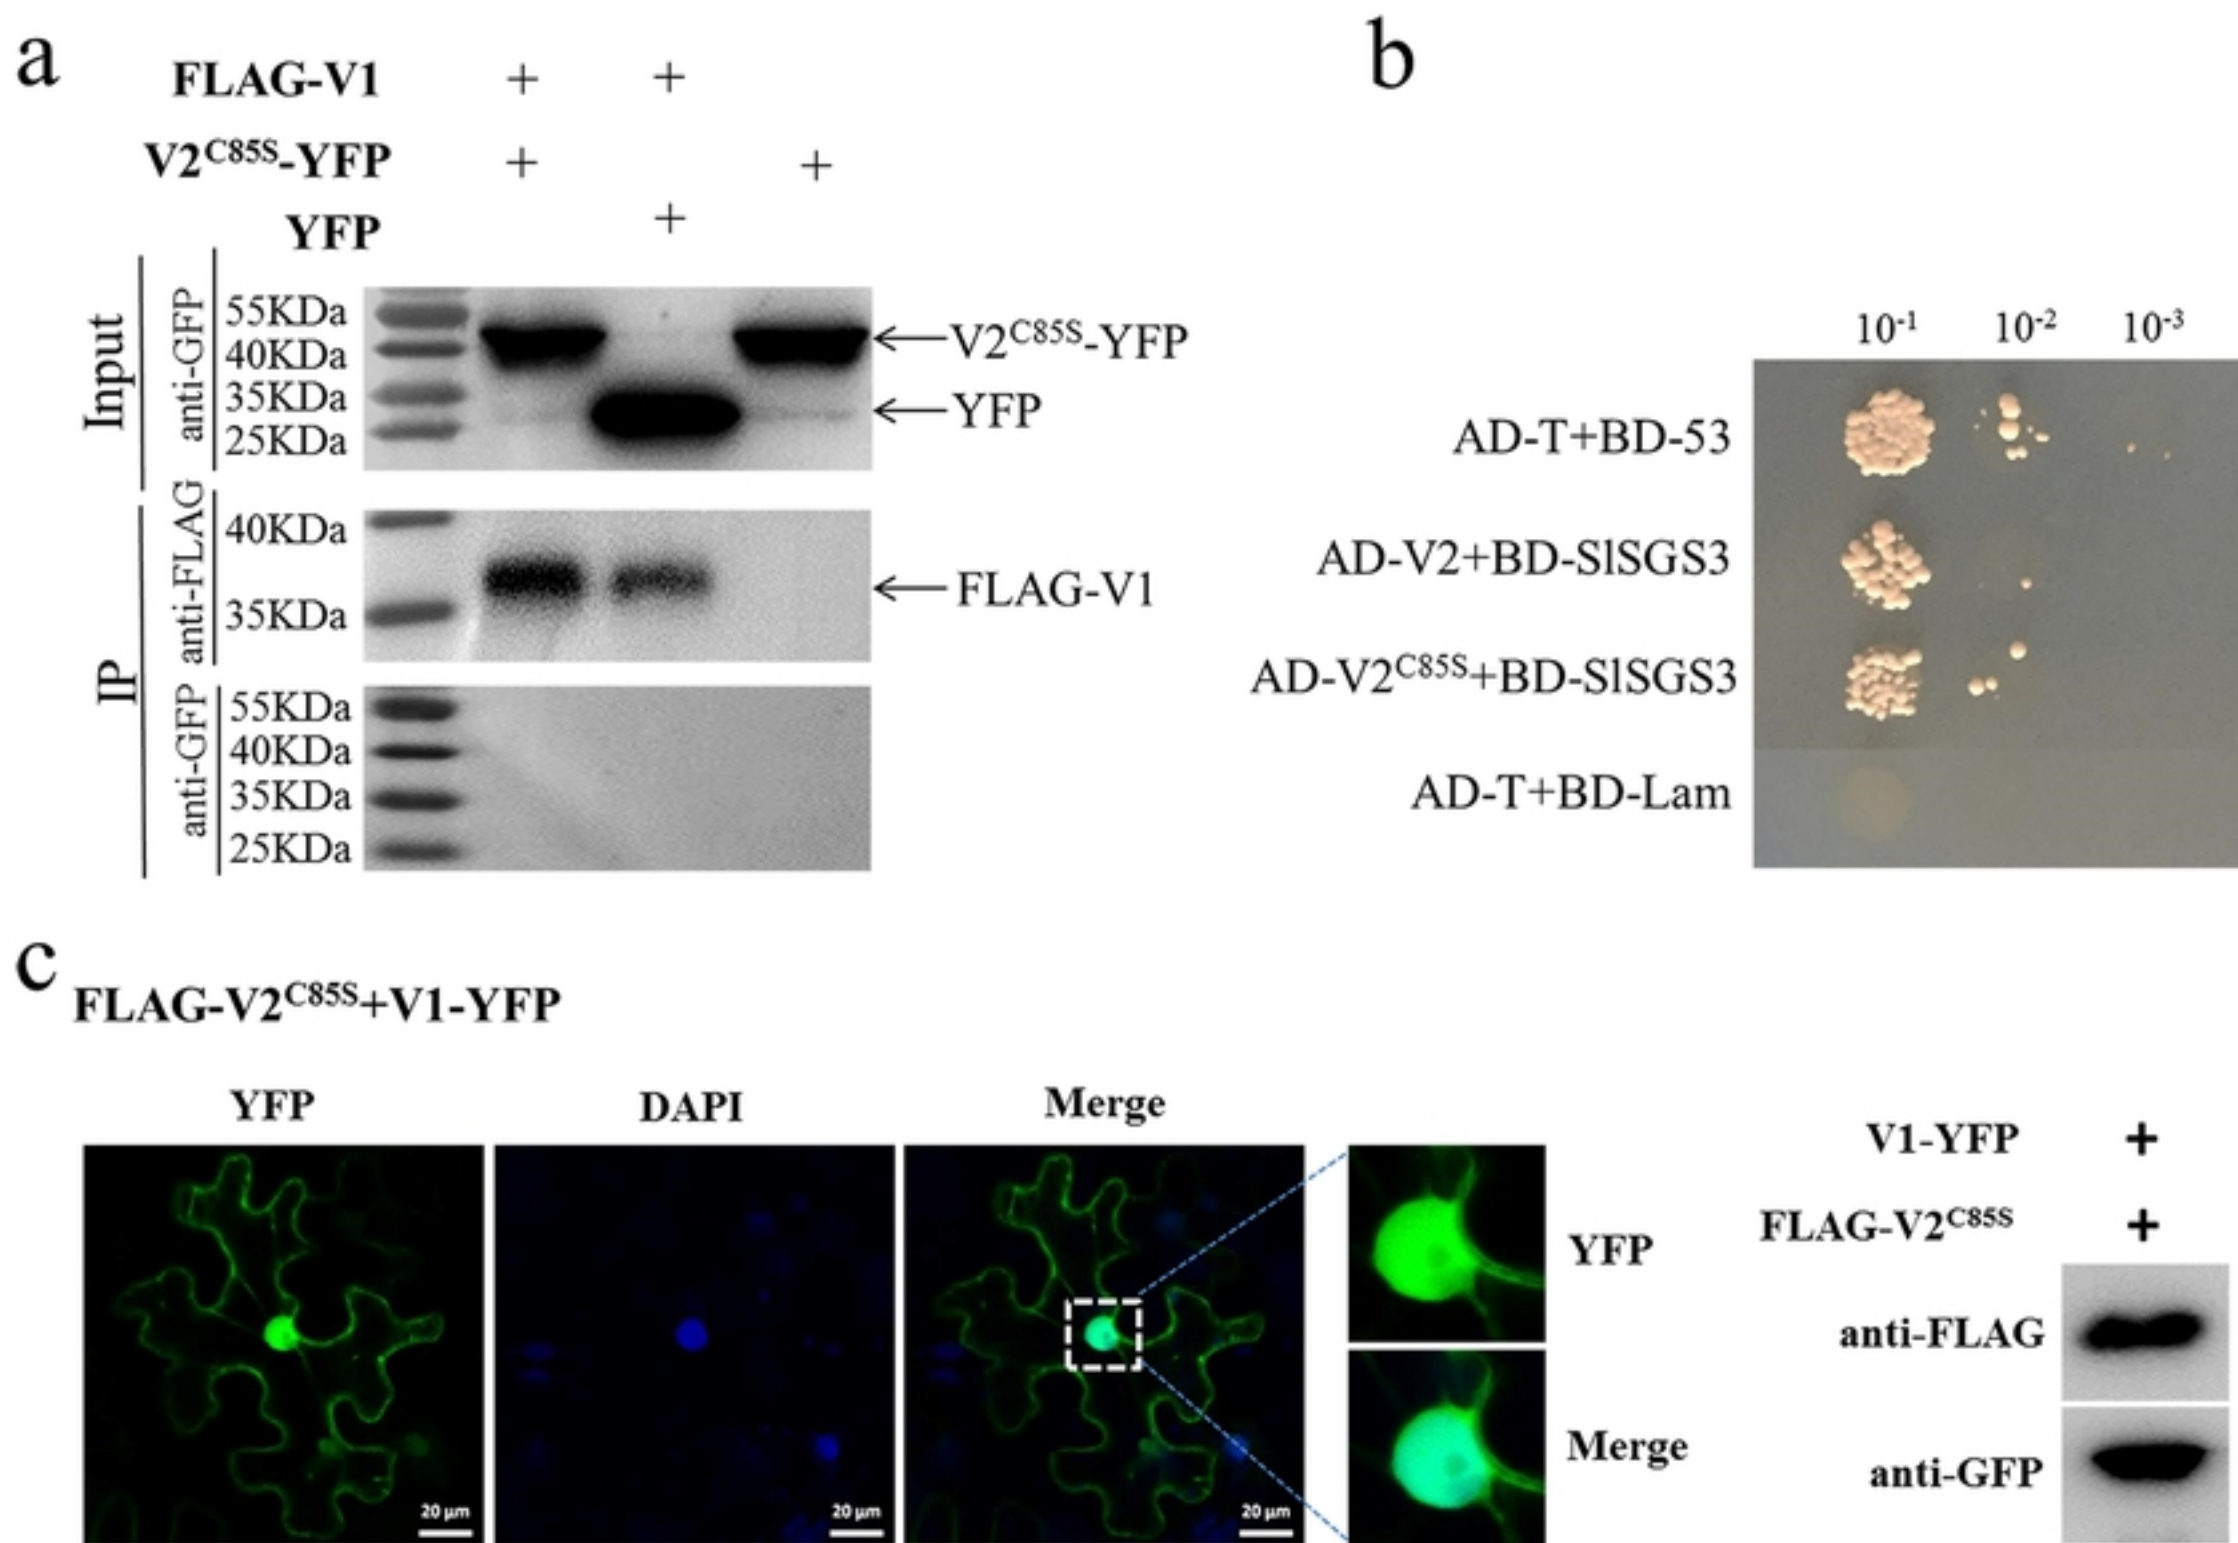

Fig S1
